# 1 **OPENPichia: building a free-to-operate *Komagataella phaffii*** 2 **protein expression toolkit**

3 Dries Van Herpe<sup>1,2,3\*</sup>, Robin Vanluchene<sup>1,2\*</sup>, Kristof Vandewalle<sup>1,2</sup>, Sandrine Vanmarcke<sup>1,2</sup>, Elise  
4 Wyseure<sup>1,2</sup>, Berre Van Moer<sup>1,2</sup>, Hannah Eeckhaut<sup>1,2</sup>, Daria Fijalkowska<sup>1,2</sup>, Hendrik Grootaert<sup>1,2</sup>,  
5 Chiara Lonigro<sup>1,2</sup>, Leander Meuris<sup>1,2</sup>, Gitte Michielsen<sup>1,2</sup>, Justine Naessens<sup>1,2</sup>, Charlotte Roels<sup>1,2</sup>,  
6 Loes van Schie<sup>1,2</sup>, Riet De Rycke<sup>4,5</sup>, Michiel De Bruyne<sup>4,5</sup>, Peter Borghgraef<sup>5</sup>, Katrien Claes<sup>1,2\*\*</sup>  
7 and Nico Callewaert<sup>1,2\*\*</sup>

8 <sup>1</sup>Unit for Medical Biotechnology, Center for Medical Biotechnology, VIB, Technologiepark 75, 9052 Ghent,  
9 Belgium.

10 <sup>2</sup>Department of Biochemistry and Microbiology, Ghent University, K.L.-Ledeganckstraat 35, 9000 Ghent,  
11 Belgium.

12 <sup>3</sup>Inbiose NV, Ghent, Belgium.

13 <sup>4</sup>Department of Biomedical Molecular Biology, Ghent University, Ghent, Belgium.

14 <sup>5</sup>Biolmaging Core, VIB, Technologiepark 71, 9052 Ghent, Belgium.

15

16 \* These authors contributed equally to this manuscript.

17 \*\*Correspondence should be addressed to N.C. ([Nico.Callewaert@vib-ugent.be](mailto:Nico.Callewaert@vib-ugent.be)) and  
18 K.C ([Katrien.Claes@vib-ugent.be](mailto:Katrien.Claes@vib-ugent.be)).

19

20           **Abstract**

21    In the standard toolkit for recombinant protein expression, the yeast known in biotechnology as  
22    *Pichia pastoris* (formally: *Komagataella phaffii*) takes up the position between *E. coli* and HEK293  
23    or CHO mammalian cells, and is used by thousands of laboratories both in academia and industry.  
24    The organism is eukaryotic yet microbial, and grows to extremely high cell densities while  
25    secreting proteins into its fully defined growth medium, using very well established strong  
26    inducible or constitutive promoters. Many products made in *Pichia* are in the clinic and in industrial  
27    markets. *Pichia* is also a favoured host for the rapidly emerging area of ‘precision fermentation’  
28    for the manufacturing of food proteins. However, the earliest steps in the development of the  
29    industrial strain (NRRL Y-11430/CBS 7435) that is used throughout the world were performed  
30    prior to 1985 in industry (Phillips Petroleum Company) and are not in the public domain. Moreover,  
31    despite the long expiry of associated patents, the patent deposit NRRL Y-11430/CBS 7435 that  
32    is the parent to all commonly used industrial strains, is not or no longer made freely available  
33    through the resp. culture collections. This situation is far from ideal for what is a major chassis for  
34    synthetic biology, as it generates concern that novel applications of the system are still  
35    encumbered by licensing requirements of the very basic strains. In the spirit of open science and  
36    freedom to operate for what is a key component of biotechnology, we set out to resolve this by  
37    using genome sequencing of type strains, reverse engineering where necessary, and  
38    comparative protein expression and strain characterisation studies. We find that the industrial  
39    strains derive from the *K. phaffii* type strain lineage deposited as 54-11.239 in the UC Davis Phaff  
40    Yeast Strain collection by Herman Phaff in 1954. This type strain has valid equivalent deposits  
41    that are replicated/derived from it in other yeast strain collections, incl. in ARS-NRRL NRRL  
42    YB-4290 (deposit also made by Herman Phaff) and NRRL Y-7556, CBS 2612 and NCYC 2543.  
43    We furthermore discovered that NRRL Y-11430 and its derivatives carry an ORF-truncating  
44    mutation in the *HOC1* cell wall synthesis gene, and that reverse engineering of a similar mutation  
45    in the NCYC 2543 type strain imparts the high transformability that is characteristic of the industrial  
46    strains. Uniquely, the NCYC 2543 type strain, which we propose to call ‘OPENPichia’ henceforth,  
47    is freely available from the NCYC culture collection, incl. resale and commercial production  
48    licenses at nominal annual licensing fees<sup>1</sup>. Furthermore, our not-for-profit research institute VIB  
49    has also acquired a resale/distribution license from NCYC, which we presently use to openly  
50    provide to end-users our genome-sequenced OPENPichia subclone strain and its derivatives,  
51    i.e., currently the highly transformable *hoc1<sup>tr</sup>* and the *his4* auxotrophic mutants. To complement  
52    the OPENPichia platform, a fully synthetic modular gene expression vector building toolkit was  
53    developed, which is also openly distributed, for any purpose. We invite other researchers to  
54    contribute to our open science resource-building effort to establish a new unencumbered standard  
55    chassis for *Pichia* synthetic biology.

## 56 Introduction

57 Presently, a wide variety of microbial hosts is available for the production of recombinant proteins.  
58 However, for general laboratory use as well as biopharmaceutical protein manufacturing, a strong  
59 consolidation has taken place over the past years. *E. coli* remains the most-frequently used  
60 prokaryotic system for proteins of prokaryotic origin and for relatively simple stably folding proteins  
61 of eukaryotic origin, especially those with no or few disulphide bonds. On the other end, production  
62 in HEK293 or CHO cells is used for production of proteins of higher eukaryotic origin, affording  
63 *i.a.* complex-type N-glycosylation. The methylotrophic yeast known in biotechnology as *Pichia*  
64 *pastoris* (and formally classified as *Komagataella phaffii*) takes up the intermediate-complexity  
65 position in most protein expression lab's toolkit, as it combines the easy cultivation and fast growth  
66 of a micro-organism with the presence of a eukaryotic secretory system and the ensuing ability to  
67 perform complex post-translational modifications such as N-glycosylation and strong capacity for  
68 the formation and isomerization of disulphide bonds<sup>2-4</sup>. Hundreds of papers are published every  
69 year reporting on the use of *Pichia* for protein production (and increasingly also for engineered  
70 metabolite production, incl. in the area of sustainable chemical building block manufacturing from  
71 methanol and even CO<sub>2</sub><sup>5</sup>). Quite often, *Pichia*-produced proteins are developed by academic and  
72 industrial scientists alike with an eventual applied/commercial use in mind, being it as a  
73 therapeutic compound, an industrial biocatalyst<sup>6,7</sup> or more recently, as a food ingredient.

74 Historically, in 1954 Herman Phaff deposited a methylotrophic yeast strain from a black oak tree  
75 (*Quercus*) in the Yosemite region<sup>8</sup>. The isolate was stored in the culture collection of the University  
76 of California at Davis as UCD-FST K-239, with formally equivalent type strain deposits in other  
77 culture collections as NRRL YB-4290, NRRL Y-7556, CBS 2612 and NCYC 2543. At this time,  
78 these isolated strains of Phaff could not be distinguished from similar strains isolated in 1919 by  
79 A. Guilliermond, and Herman Phaff categorized both together as a new species: *Pichia pastoris*  
80 (the genus *Pichia* was established half a century before, in 1904, by E. Hanssen<sup>9</sup>) (Figure 1). In  
81 1995, *Pichia pastoris* was re-classified into the new genus of *Komagataella*, named after the  
82 Japanese scientist Kazuo Komagata as a tribute to his contributions to yeast systematics, in  
83 particular the methanol-assimilating yeasts<sup>10</sup>. In 2005, the two distinctly evolved isolates from  
84 Phaff and Guilliermond were divided into two separate species and renamed *Komagataella phaffii*  
85 and *Komagataella pastoris* by C. Kurtzman<sup>11</sup>, based on the sequencing of 26S rDNA.  
86 Consequently, the strain of Phaff (UCD-FST K-239, NRRL YB-4290, NRRL Y- 7556, CBS 2612,  
87 and NCYC 2543) was now considered the type strain of the species *Komagataella phaffii*, while  
88 the strain of Guilliermond (CBS 704 or NRRL Y-1603) was regarded as the type strain of the  
89 species *Komagataella pastoris*.

90 By the 1970's, these yeast species that can utilize methanol as the sole carbon source<sup>12-14</sup>  
91 sparked the interest of Phillips Petroleum Company, since they had a vast supply of cheap  
92 methane gas (a by-product of their oil refinement process), which can be easily oxidized to  
93 methanol by chemical oxidation. Hence, they explored the available methylotrophic yeast species  
94 through procedures that are not in the public domain, and selected a *Pichia pastoris* to grow on  
95 the synthesized methanol and produce a single cell protein source for animal feed using  
96 fermentation. The application was patented in 1980 (with the earliest priority application on April  
97 12<sup>th</sup>, 1979)<sup>15</sup>, which required the strain to be deposited once more in public culture collections and  
98 it became known as NRRL Y-11430 and CBS 7435. Which exact strain was deposited, is not  
99 described in the patent, nor available in the public domain. It was already assumed that it could  
100 be either the isolate from Guillermond (NRRL Y-1603) or that of H. Phaff (NRRL Y-4290)  
101 (GRN 737). However, recent efforts of genomic sequencing show that the genetic differences  
102 between both lineages are large enough to conclude that the latter was used<sup>16,17</sup>.

103 In the early 80's, Phillips Petroleum Company contracted with the Salk Institute  
104 Biotechnology/Industrial Associates (SIBIA) to develop the organism for recombinant protein  
105 production, based primarily on the extremely strong and tightly regulated Alcohol Oxidase 1  
106 promoter (pAOX1). In this context, NRRL Y-11430 derived strains were generated with  
107 auxotrophies, such as the GS115 strain, which is a *his4* auxotrophic mutant obtained through  
108 nitrosoguanidine mutagenesis of NRRL-Y11430<sup>18</sup>, and the X33 strain that is a *HIS4*  
109 complemented strain deriving from GS115, likely via an intermediate<sup>18-20</sup>. In 1993, Phillips  
110 Petroleum sold its patent position in the *Pichia* system to Research Corporation Technologies  
111 (RCT, Tucson, AZ)<sup>21</sup>, apparently including the strain patent deposits associated to this, and their  
112 derived strains. Unfortunately, NRRL Y-11430 is not distributed anymore, likely because the  
113 patentee is no longer under an obligation to provide the strain, given that the associated patent(s)  
114 have expired almost 20 years ago. Indeed, the NRRL Y-11430 in the Agricultural Research  
115 Service culture collection (ARS-NRRL) is no longer available, and the same is the case for the  
116 CBS 7435 strain in the collection of the Westerdijk Fungal Biodiversity Institute (CBS). Also, it  
117 appears that the strain and its popular derivatives, incl. their distribution, are still controlled by the  
118 original patent holder. This occurs through the enforcement of Material Transfer Agreements  
119 (MTAs) that were associated to obtaining the strain from the NRRL culture collection during the  
120 time it was maintained as a patent deposit, or conditions of sale associated to obtaining derivative  
121 strains through the commercial distribution by Invitrogen (currently a brand of Thermo Fisher  
122 Scientific) as part of *Pichia* expression system kits. To our knowledge, the NRRL Y-11430  
123 parental industrial strain can currently only be obtained at the American Type Culture Collection  
124 (ATCC 76273) under a similarly restrictive MTA. Because of the RCT-mandated distribution of  
125 *Pichia* expression technology kits by Invitrogen, for more than two decades, thousands of protein

126 expression labs have extensive experience with the GS115 family of strains that were included in  
127 these kits<sup>22,23</sup> and the currently approved biopharmaceuticals are manufactured by use of the  
128 NRRL Y-11430 industrialized strain lineage. Many researchers are not fully aware of the  
129 restrictions to strain distribution and potential applied use downstream of discoveries and  
130 inventions made with them. Without prejudicing the legal aspects of some of this, which is outside  
131 of our field of competence, as scientists we find it entirely unsatisfactory that the very basis of a  
132 critical mainstay of academic and industrial biotechnology remains not simply openly accessible  
133 exceedingly long after the original patents have expired. Given that *Pichia* takes such an ever  
134 more prominent place in the toolkit for diverse sectors of synthetic biology and biotechnology, we  
135 believe that it is long overdue for an open-access alternative strain platform to be set up by the  
136 community. To continue to take benefit of the extensive regulatory agency acquaintance with  
137 *Pichia*, it is important to achieve this by use of the same parental strain lineage as used in the  
138 strains that were industrialized so far.

139 To achieve this goal, we and others have recently turned to the *Komagataella phaffii* type strains  
140 that are present in culture collections throughout the world, armed with now highly affordable  
141 genome resequencing, to try and identify the original isolate from nature that the Phillips  
142 Petroleum researchers used in their derivation of NRRL Y-11430. In an exploration in the largest  
143 US yeast strain collection (ARS-NRRL), the Love lab at MIT found that two deposits indicated by  
144 the culture collection as equivalent *Komagataella phaffii* type strains (NRRL YB-4290, directly  
145 deposited by Herman Phaff, and NRRL Y-7556), are genetically identical. Furthermore, in  
146 comparison to this type strain, in their analysis they found only 1 point mutation leading to a  
147 truncation of the Rsf2p open reading frame in NRRL Y-11430<sup>24</sup>, establishing the type strain  
148 lineage of this industrial strain. In this study, the NRRL type strains were found to have problems  
149 with easily generating high copy number transformants and the authors recommended to keep  
150 using the industrial NRRL Y-11430 strain background for recombinant protein production,  
151 especially for expressions under methanol control. The NRRL YB-4290 strain is also present in  
152 the UC Davis Phaff Yeast Culture Collection as its deposit made by Herman Phaff in 1954, and  
153 numbered 54-11.239 (referred to as UCD-FST K-239 in the NRRL entries). It is documented in  
154 the collections as having been isolated at Mather, Central Sierra Nevada, California, USA, from  
155 the exudate flux of a black oak (*Quercus kelloggii*). Given its origin, no Access and Benefit Sharing  
156 restrictions apply to its use for any purpose (Nagoya Protocol or Convention on Biological  
157 Diversity). This type strain was also deposited in European culture collections: at the Westerdijk  
158 Fungal Biodiversity Institute (CBS, Delft, The Netherlands, deposit CBS 2612) and at the National  
159 Collection of Yeast Cultures (Norwich, UK, deposit NCYC 2543). In our present study, we started  
160 out by analysing the genome of the four type strains. We then focused on the NCYC 2543 strain,  
161 as the NCYC collection uniquely provides standard very affordable distribution and commercial

162 use licenses for its strains and derivatives thereof, fulfilling our requirements for a community  
163 open-access *Pichia* platform strain. Different from all other culture collections where the *K. phaffii*  
164 type strain deposits are found, technology developers can acquire a distribution license to end-  
165 users for their newly generated materials, or have the choice of also depositing these in the NCYC  
166 collection for full open access. Hence, we propose to nickname this NCYC 2543 type strain  
167 deposit as 'OPENPichia'. In an effort to establish confidence in the OPENPichia strain as a new  
168 standard open-access *Pichia* chassis for use by the research and biotechnological industry  
169 community, we set out on a comprehensive characterization of its genome, growth characteristics,  
170 transformation efficiency and recombinant protein expression, in comparison to the NRRL  
171 Y-11430 industrial strain. We discovered a key frameshift mutation in the *HOC1* gene of the  
172 industrial strain that enhances conduciveness to transformation, and introduced this mutation in  
173 OPENPichia using open-source genome engineering technology, to overcome this important  
174 limitation. Further characterization of this OPENPichia-*hoc1<sup>tr</sup>* strain in comparison to NRRL  
175 Y-11430 in terms of growth rate, cell wall density and cell sensitivity to cell envelope-binding  
176 chemicals confirmed it to be indistinguishable phenotypically from the industrial strain. As set forth  
177 below, we complement this OPENPichia strain set with an OPENPichia modular protein  
178 expression vector toolkit, entirely made up of synthetic DNA to avoid any third-party MTAs, and  
179 following the Golden Gate cloning standard for compatibility with complementary toolkits from  
180 other *Pichia* developer labs<sup>25</sup>. The basic NCYC 2543 OPENPichia strain is available from NCYC,  
181 incl. straightforward and low-cost distribution licenses for labs that develop novel strains. Our own  
182 derived OPENPichia strains described in this paper are openly available for end-users (incl. for  
183 royalty-free *Pichia*-made commercial product manufacturing) under such distribution license that  
184 our not-for-profit research institution VIB obtained from NCYC. OPENPichia vector cloning  
185 materials are openly distributed for any utilization purpose in association with the public plasmid  
186 collection of the Belgian Coordinated Collection of Microorganisms.

187

## 188 **Results**

### 189 **The genomes of the *K. phaffii* type strains and commercial strains are virtually identical**

190 To evaluate alternative *K. phaffii* strains at the genomic level, we deeply (avg. 180x genome  
191 coverage) resequenced the genome of several type strains available at culture collections (i.e.,  
192 NRRL YB-4290 / NRRL Y-7556 / CBS 2612 / NCYC 2543) in comparison to the NRRL Y-11430  
193 industrial strain (**Error! Reference source not found.**) (Supplementary Table 1 and 2). The reads  
194 were mapped against the published reference genome of the CBS 7435 strain incl. the  
195 mitochondrial genome sequence and that of the two *K. phaffii* linear killer plasmids<sup>26</sup>. CBS 7435  
196 is a deposit of the NRRL Y-11430 industrial strain in the CBS culture collection (Delft, The



197 Netherlands). To this end, the Breseq<sup>27</sup> software package was used in consensus mode. There  
198 was some variation in overall GC content, which can be attributed to the varying amount of  
199 mitochondrial DNA and the presence of the two killer plasmids in some of the strains, as these  
200 have an average GC content of 24%, 28% and 29%, respectively (unlike the nuclear  
201 chromosomes, which have an average GC content of 41%). Indeed, the read alignment showed  
202 that the proportion of reads that mapped to the mitochondrial genome varied between 10 and  
203 47%.

204 The proportion of reads originating from the two killer plasmids, varied between 0% and 9%  
205 (Supplementary Table 2). The *K. phaffii* killer plasmids are linear autonomously replicating DNA  
206 fragments of 9.5 kb and 13.1 kb<sup>19</sup> that encode exotoxins that can kill other yeast cells<sup>17,19</sup>. These  
207 toxins may also be toxic to cells from the same species, in case these have lost resistance to the  
208 toxin, and this phenomenon is therefore undesired in large scale culturing of yeast as it may  
209 reduce the overall viability of the culture. To verify the presence of such killer plasmids in the  
210 tested strains, their sequences, as reported by Sturmberger *et. al.*, were included in the reference  
211 for the alignment of the reads<sup>26</sup>. Surprisingly, the killer plasmids could not be detected in both the  
212 CBS 2612 and NCYC 2543 strain, while such reads were abundant for the analysed NRRL strains  
213 (NRRL YB-4290, Y-7556 and Y-11430) (Table 2). According to the strain history, the NRRL  
214 YB-4290 and CBS 2612 strains were deposited by Phaff, while the NRRL Y-7556 strain was a  
215 redeposit of CBS 2612 by D. Yarrow (CBS). Since the daughter strain (NRRL Y-7556), still has  
216 these killer plasmids, the mother strain (CBS 2612) should have had them as well, leading to the  
217 conclusion that these linear plasmids are easily lost while propagating *K. phaffii* strains. In our lab  
218 as well, several NRRL Y-11430 descendants were identified that have lost these killer plasmids  
219 upon the standard microbial practice of single colony streaking (unpublished data). Also, the  
220 commercial strain GS115, does not have any killer plasmids<sup>18</sup>.

221 Using a Maximum Likelihood method and the Hasegawa-Kishino-Yano model, a phylogenetic  
222 tree based on the nuclear genome was computed to visualize the genetic distances between the  
223 sequenced strains and a variety of other *K. phaffii* strains whose genomes were published  
224 previously<sup>18,24,28</sup>. All *K. phaffii* type strains are strongly clustered together with the NRRL Y-11430  
225 and CBS 7435 strains, as well as other close relatives (Figure 2). Thus, these data support  
226 previous literature<sup>24,29</sup>, where it was hypothesized that all these strains are derived from the same  
227 isolate, originally isolated by Phaff<sup>28</sup>.

228 Based on the resequencing data, we identified single nucleotide polymorphisms (SNPs) and short  
229 insertion-deletions (indels) (Table 2). First comparing the mutation calling of strain NRRL Y-11430  
230 with the reference genome of the equivalent-deposit CBS 7435 strain reference revealed only  
231 one protein-coding difference in one hypothetical protein and about 20 intergenic/intronic/silent  
232 exonic differences. All these alterations were also identified in the type strains, indicating that

233 these are likely to be considered as the wild type *K. phaffii* genotype and that the CBS 7435  
234 reference genome was most likely miscalled at these sites. The same holds for two insertions that  
235 were observed in each of the sequenced strains in a region annotated to encode for a hypothetical  
236 papain-like cysteine protease. This region appears to have been difficult to sequence in previous  
237 experiments, as also in the datasets associated with a previous type strain genome sequencing  
238 study<sup>24</sup>, we found only a few reads mapping to this area, which were accompanied by many  
239 mutations, low quality bases (Phred scores of <28) and low overall mapping quality score (<20).  
240 Note that the type strain deposits of the different culture collections also differ from one another  
241 each at one other coding sequence-altering genomic position and a few non-coding ones, likely  
242 reflecting drift due to background mutational rate during strain propagation (Table 2 and 3).  
243 We then focused on the very few protein-coding alterations that consistently distinguish the  
244 industrial strain NRRL Y-11430 from the equivalent type strain deposits NRRL YB-4290, NRRL  
245 Y-7556, CBS 2612, and NCYC 2543. Three coding sequence altering mutations (in *SEF1*, *RSF2*,  
246 and *HOC1*) were shared by all type strains but were absent in the NRRL Y-11430 strain. Our re-  
247 analysis of the raw sequencing reads from a previous genome analysis of deposits NRRL  
248 YB-4290 and NRRL Y-7556 confirmed the presence of these mutations and their absence in the  
249 NRRL Y-11430 strain also based on these datasets<sup>24</sup>. Data quality in the area of the *SEF1* and  
250 *HOC1* mutation is rather poor in these earlier datasets, and the authors only detected the mutation  
251 in *RSF2*<sup>24</sup>. Since all three mutations are shared by the type strains, it must be concluded that they  
252 represent the original state of *K. phaffii*, and that NRRL Y-11430 is actually the mutant strain at  
253 these three loci.

254

### 255 **Three mutations in protein-coding regions in the NRRL Y-11430/CBS 7435 industrial strain** 256 **lineage vs. the type strain deposits**

257 *SEF1* encodes for a putative transcription factor (UniProt ID F2QV09) and the observed SNP  
258 causes a S315C mutation in NRRL Y-11430 as compared to the type strains. *RSF2* encodes for  
259 a transcription factor which is involved in methanol- and biotin-starvation (UniProt ID F2QW29).  
260 The observed mutation is a SNP which causes the introduction of a stop codon (W748\*) in NRRL  
261 Y-11430, resulting in the deletion of 183 amino acids from the C-terminus of the protein. The non-  
262 truncated Rsf2p which is found in the *K. phaffii* type strains, is very similar to its homolog in *S.*  
263 *cerevisiae*<sup>30</sup>, additionally indicating that this was the original genomic state, as previously  
264 reported<sup>24</sup>. *HOC1* (homolog of *OCH1*) encodes for an  $\alpha$ -1,6-mannosyltransferase (UniProt ID  
265 F2QVW2) involved in the synthesis of cell wall mannan and is part of the M-Poll complex<sup>31</sup>. Here,  
266 the industrial strain NRRL Y-11430 has a single base pair deletion in a poly-A stretch (at bp 755  
267 of the 1191 bp long coding sequence), as compared to the type strains. This causes a frameshift  
268 and premature stop codon, resulting in a C-terminally truncated protein (274 versus 398 amino



269 acids), with the last 22 amino acids up to the new stop codon being different from the type strain  
270 sequence. The indel in the homopolymer was confirmed by Sanger sequencing (data not shown).  
271 In parallel to our work, the same mutation was identified by the lab of Kenneth Wolfe (UC Dublin),  
272 as the phenotype-causative mutation for a quantitative trait locus (QTL) that yielded 2-3 fold  
273 higher secretion of a reported beta-glucosidase (personal communication, publication in press<sup>29</sup>).  
274 With this knowledge on which mutations could be involved in phenotypic differences between the  
275 type strains and the industrial strains, we set out for a comparison of characteristics important to  
276 the use of *Pichia* for recombinant protein production. Given that the NCYC 2543 deposit of the  
277 type strain was the only one for which the resp. culture collection openly provides both commercial  
278 and re-sale/strain distribution licenses as part of its standard business practice<sup>1</sup>, we further mainly  
279 focused on this deposit's characteristics, and we called it OPENPichia.

280

### 281 **Strain comparison for growth rate, protein production and transformation efficiency**

282 NCYC 2543/OPENPichia was compared to NRRL Y-11430 and GS115, both in terms of growth  
283 rate and their capacity for expressing recombinant proteins. GS115 is a *his4* auxotrophic mutant  
284 derived from NRRL Y-11430 by nitrosoguanidine mutagenesis and, depending on the analysis,  
285 its genome contains about 69<sup>32</sup>, 74<sup>24</sup> or 71 (our unpublished data) mutations vs. that of its parent.  
286 To be able to evaluate the impact of *his4*-mediated histidine auxotrophy on strain characteristics,  
287 we generated an OPENPichia *his4* strain using the split-marker method<sup>33,34</sup>. No significant  
288 difference in growth rate between the type strains and NRRL Y-11430 could be observed  
289 (**Error! Reference source not found.**), but the GS115 strain grew significantly more slowly (one-  
290 way ANOVA,  $p=0.0034$ , Tukey test), as reported<sup>24</sup>. Interestingly, our histidine auxotrophic  
291 OPENPichia does not show the slower growth phenotype, demonstrating that this GS115  
292 phenotype is not due to histidine auxotrophy, but rather must be due to one or more of the other  
293 nitrosoguanidine-induced mutations in its genome. As *his4* complementation is an often-used  
294 antibiotic-free selection marker, this unaffected growth rate in the OPENPichia *his4* strain is a  
295 useful feature.

296

297 To compare the protein production capacity of the strains, a selection of model proteins was  
298 produced in NRRL Y-11430 and OPENPichia (

299 Table ). Four proteins of very different types in use in biotechnology were chosen: a cytokine (GM-  
300 CSF), a redox enzyme (GaOx), a VHH-hFc $\alpha$  fusion (Cdiff-VHH-IgA), and a VHH-hFc $\gamma$  fusion  
301 (CovidVHH-IgG). To enable recombinant expression, the two most commonly used off-patent *K.*  
302 *phaffii* promoters were tested: pGAP for strong constitutive and pAOX1 for strong methanol-  
303 inducible expression, respectively. Protein expression in *K. phaffii* is prone to clonal variations  
304 that can interfere with the comparison of expression capabilities between strains. Most of the

305 variation is due to the integration site and the copy number of the construct<sup>35</sup>. To this end, a single-  
306 copy was targeted to the respective promoter regions in the genome, the copy number and  
307 integration site were confirmed by qPCR and integration-site specific PCR, and two independent  
308 clones of each setup were grown in triplicate.

309 For both the pGAP-driven and pAOX1-driven expressions, there is in general no major difference  
310 in protein production titres between the two hosts. However, there is a clear difference in cell  
311 density at harvest of the pGAP cultures, with OPENPichia growing to higher densities than NRRL  
312 Y-11430 (Supplementary Figure 1), whereas this is not the case on methanol. Additionally, in all  
313 cases, NRRL Y-11430 shows slightly more host cell proteins (HCPs) in the medium of the pGAP  
314 expressions (on limiting glucose), as visible on the SDS-PAGE gels (Figure 4), but not when  
315 grown on methanol. Both observations point towards a minimally increased cell lysis of the NRRL  
316 Y-11430 strain vs. the OPENPichia strain when grown on glucose.

317

### 318 ***HOC1*-truncation restores the transformation efficiency in NCYC 2543**

319 Upon generating expression clones, a strongly reduced transformation efficiency was observed  
320 for OPENPichia as compared to NRRL Y-11430 (Figure 5C), as was also observed by others<sup>24</sup>.  
321 Out of the three consistent protein-coding differences between the type strains and NRRL  
322 Y-11430, we reasoned that the one in the *HOC1* open reading frame could be causative for the  
323 low transformation efficiency of the type strains, as the *S. cerevisiae* Hoc1p ortholog is an  
324  $\alpha$ -1,6-mannosyltransferase that is part of the mannan polymerase II complex in the yeast Golgi  
325 apparatus. The hypermannosyl-N-glycans, of which the backbone is synthesized by this mannan  
326 polymerase complex, form the outermost layer of the ascomycete cell wall, and carry most of their  
327 charge under the form of mannosylphosphate modifications on the side chains. *HOC1* deletion in  
328 *S. cerevisiae* is viable though the phenotyping and genetic interaction data available in the  
329 *Saccharomyces* Genome Database clearly indicate a cell wall stress response. As negatively  
330 charged plasmid DNA during transformation has to traverse the cell wall, a cell wall that presents  
331 less of a diffusional/charge barrier due to less mannan/mannosylphosphate density could explain  
332 the more highly transformable phenotype of NRRL Y-11430. Using the split-marker method, we  
333 introduced this single base pair deletion in the genome of OPENPichia, hence reverse  
334 engineering the genetic makeup of the NRRL Y-11430 strain (Figure 5A) in this locus. Two mutant  
335 versions were generated: NCYC 2543 *hoc1*<sup>tr</sup>-1, where only the single base pair was deleted,  
336 resulting in the truncated ORF and a *Lox72*-scar downstream of the novel stop codon; and NCYC  
337 2543 *hoc1*<sup>tr</sup>-2, where additionally 115 bp downstream of the novel stop codon were removed  
338 (Figure 5B). The transformation efficiency was compared between the two wild type strains and  
339 the *hoc1*<sup>tr</sup> mutants, using a plasmid encoding for a VHH under control of the *GAP* or *AOX1*  
340 promoter. The *HOC1*-truncation drastically increased the transformation efficiency of the

341 OPENPichia strain, and even showed a 2-3-fold improvement as compared to the NRRL Y-11430  
342 in this experiment (Figure 5C). In general, it was also observed that the transformation efficiency  
343 for pGAP-based plasmids is lower as compared to similar plasmids that are pAOX1-based, which  
344 we speculate is due to the metabolic burden imposed by constitutive GBP VHH production during  
345 recovery of the cells after transformation.

346

#### 347 **Characterization of the NRRL Y-11430, NCYC 2543 and NCYC 2543 *hoc1<sup>tr</sup>* cell wall**

348 These strains were further characterized in terms of their cell wall composition. First, the cell wall  
349 mannoprotein N-glycans were profiled by capillary electrophoresis<sup>36</sup> after the cells were grown on  
350 glucose or glycerol (Supplementary Figure 2). This method mainly detects the lower-degree of  
351 polymerization N-glycans, and the profiles were very similar for all four strains, indicating that the  
352 pathway of synthesis of the mannan core was intact in all strains. This capillary electrophoresis  
353 method is however unsuited to the detailed profiling of the higher-polymerized mannan N-glycans,  
354 as there are so many isomeric structures formed that are all in part or completely resolved, such  
355 that they form one long trail of overlapping low-abundance peaks that is impossible to interpret.  
356 Most of the mannosylphosphate negative charge-imparting moieties are added to the mannan  
357 side branches of these long chains. They bind to cationic dyes such as Alcian Blue and hence  
358 the staining density of yeast cells with such dye reflects the density of these negative charges on  
359 the outermost layer of the cell wall. Indeed, as compared to the type strain NCYC  
360 2543/OPENPichia, both NRRL Y-11430 and the two OPENPichia *hoc1<sup>tr</sup>* mutants showed a  
361 reduced Alcian Blue staining intensity (Figure 6A). This is consistent with the reduced Alcian Blue  
362 staining of *S. cerevisiae hoc1* mutants<sup>37,38</sup>.

363 To further investigate the cell wall integrity, resistance of the strains towards Congo red and  
364 Calcofluor white was analysed (Figure 6B) using previously reported methods<sup>24,29</sup>. The  
365 OPENPichia type strain is much more resistant than NRRL Y-11430 towards both dyes, a  
366 difference which is lost in the *HOC1*-truncated OPENPichia mutants. This indicates the  
367 importance of Hoc1p in cell wall integrity. We also performed transmission electron microscopy  
368 (TEM) using a freeze substitution technique that is optimized to pull in the osmium tetroxide  
369 membrane-staining contrast reagent as well as fixatives through the cell wall during the slow  
370 dehydration of the cells, which is then reversed in subsequent sample preparation. We observe  
371 a much stronger electron scattering at the outermost cell wall layer of the wild type OPENPichia  
372 type strain than for the other, *HOC1*-truncated strains (NRRL Y-11430 and OPENPichia *hoc1<sup>tr</sup>*)  
373 (Figure 6C). We interpret that this is caused by OsO<sub>4</sub>-accumulation at the mannan layer of the  
374 cell wall due to a stronger barrier to diffusion of the reagent in the wild type strain during freeze  
375 substitution. Scanning electron microscopy looked very similar for the four strains (Figure 6C),  
376 indicating no gross malformations. In summary, the data are consistent with the *hoc1<sup>tr</sup>* mutation

377 resulting in a relatively mild cell wall integrity deficiency, resulting in increased passage of plasmid  
378 DNA during transformation and, depending on the target protein, in some cases also increased  
379 production or cell wall passage of secreted recombinant proteins<sup>29</sup>.

380

### 381 **Strain comparison for growth rate and protein production of OPENPichia *hoc1<sup>tr</sup>***

382 The growth rate, as well as protein production capacity of the newly generated OPENPichia  
383 *HOC1*-truncated strains were compared to those of NRRL Y-11430 and wild type OPENPichia.  
384 No significant difference in growth rate is observed between the 4 tested strains (Figure 7A). As  
385 we earlier found most phenotypic difference between NRRL Y-11430 and wild type OPENPichia  
386 in terms of growth and HCP levels when the strains were grown on glucose, we tested pGAP-  
387 based protein expression for the different strains (Table 4), using an anti-GFP VHH (GBP) as test  
388 protein. To this end, 24 clones of each strain were screened, except for wild type OPENPichia,  
389 where only 12 transformants were obtained (Figure 7B and C). For pGAP-based GBP expression,  
390 the NCYC 2543 *hoc1<sup>tr</sup>* strains outperform the NCYC 2543 strain, and NCYC 2543 *hoc1<sup>tr</sup>-1* even  
391 outperforms NRRL Y-11430, although the differences are small and clonal distributions overlap.  
392 The result is in line with the observations made by the Wolfe lab (personal communication,  
393 publication in press<sup>29</sup>), where they observed that the truncated *HOC1* genotype in NRRL Y-11430  
394 resulted in doubling of the secretion level of a beta-glucosidase under control of the pGAP  
395 promoter, vs. rather divergent *K. phaffii* NRRL strains.

396 The presented data together with the growth and expression analysis, show that the NCYC 2543  
397 background is at least as good as an expression host as the industrial NRRL Y-11430 strain (or  
398 its derivatives). With the discovery of the *HOC1* truncation as the basis for the higher  
399 transformability of NRRL Y-11430, and the finding that it can easily be accomplished using free-  
400 to-operate recombination-based genome engineering, also this last remaining handicap of the  
401 parental NCYC 2543 was removed. Indeed, as reported recently by Brady *et al.*<sup>24</sup>, the low  
402 transformability, which makes it laborious to find clones with multicopy integration of the  
403 expression vector, was the key reason for them to decide on continued use of NRRL Y-11430-  
404 based strains over more wild type strains. This problem is now solved.

405 As no difference between the two NCYC 2543 *HOC1*-mutant versions could be observed and  
406 given their excellent performance, we decided to continue all future *Pichia* work with the version  
407 *hoc1<sup>tr</sup>-1*, which has the smallest genomic scar downstream of the truncated *HOC1* coding  
408 sequence (i.e., insertion of a remaining *Lox72* site).

409

### 410 **OPENPichia modular protein expression vector construction toolkit**

411 Many scientists have used or still use commercial *K. phaffii* expression kits, which conveniently  
412 match expression strains and vectors. Indeed, constraints in vector choice are sometimes

413 imposed by the properties of the chosen *K. phaffii* strain (e.g., selection markers, auxotrophies,  
414 methanol utilization phenotypes, etc). Although such kits are attractive to beginner users and are  
415 hence widespread within the scientific community, their conditions of sale are legally restrictive  
416 and forbid further distribution and reutilization of vector parts, let alone use in commercial  
417 production, which requires commercial licensing from the provider. Fortunately, issues with non-  
418 FTO DNA constructs can nowadays be avoided by *de novo* synthesis, combined with novel and  
419 fast cloning techniques which both emerged rapidly in the last decade<sup>39</sup>. However, establishing a  
420 new properly documented FTO genetic toolkit is still a relatively expensive and time-consuming  
421 occupation for most labs.

422 To enable scientists to express their genes of interest, a well-equipped genetic toolkit and  
423 corresponding cloning framework is provided to the community (Figure 8), and deposited at the  
424 BCCM plasmid collection. The cloning system that was chosen is modular, to enable maximum  
425 flexibility and based on Golden Gate cloning, similar to other toolkits<sup>25,40–48</sup>. These cloning systems  
426 have gained a lot of popularity as they are user-friendly and easily expandable, while also boasting  
427 high versatility in construct design. In essence, the strength of Golden Gate assembly is based  
428 on the use of Type IIS restriction endonucleases that cut outside their recognition sites, which  
429 allows users to flank DNA fragments of interest with customizable 4 nt overhangs. As such, a  
430 4 nt overhang of one fragment can be made complementary to a 4 nt overhang of another  
431 fragment, and such compatible overhangs are ligated much more efficiently, enabling directional,  
432 multi-insert cloning in a single reaction. The MoClo system takes this concept a step further, as it  
433 standardizes Golden Gate assembly by designating *a priori* all DNA elements of a desired vector,  
434 which are typically referred to as ‘parts’, to a particular ‘part type’ (e.g., promoter, CDS, etc) and  
435 flanking each part type by unique 4 nt overhangs and Type IIS restriction sites<sup>48</sup>. In practice, parts  
436 are derived from PCR fragments or synthetic constructs, which are first subcloned in entry vectors,  
437 also known as ‘Level 0’ vectors (Figure 8). As such, a collection of sequence-verified Level 0  
438 vectors is established and vectors of interest can then be assembled into expression vectors of  
439 interest, which are termed ‘Level 1’ vectors. By providing proper connector sequences with  
440 additional Type IIS restriction sites, the resulting expression vectors or Level 1 vectors can then  
441 be assembled again to obtain multigene or Level 2 vectors, which is the top level in the system’s  
442 hierarchy. In the current toolkit, all 4 nt overhangs were adopted to ensure a high degree of  
443 compatibility with existing yeast toolkits<sup>25,41,45</sup> and to ensure a near 100% predicted ligation  
444 fidelity<sup>49</sup>. Since this toolkit is essentially derived from the *S. cerevisiae* MoClo system, it shares  
445 the restriction enzymes (BsmBI and BsaI), most of the 4 nt overhangs, and the number and design  
446 of the individual part types<sup>41</sup>. As such, the system is comprised of eight part types, of which  
447 Part 3 (Coding Sequence) and Part 4 (Terminator) can still be split up to allow additional  
448 modularity, for example to incorporate N- and C-terminal fusion partners for the protein of interest



449 (Figure 8). An overview of the part types and the parts that are provided in this OPENPichia toolkit  
450 is included (Supplementary Figure 3). Part sequences are available in Supplementary Information  
451 and materials can be obtained from the BCCM GeneCorner plasmid collection<sup>50</sup>. The Material  
452 Transfer Agreement associated with it was custom-designed in collaboration with GeneCorner to  
453 allow for any use of resulting plasmids, including royalty-free commercial manufacturing.

454

## 455 Discussion

456 *Pichia pastoris* (formally known as *K. phaffii*) is an important protein production host in both  
457 academia and industry, but the most common industrially developed strains are currently  
458 distributed with restrictive MTAs, or not any longer. To facilitate academic and commercial host  
459 strain development for recombinant protein expression and easy distribution throughout the  
460 biotechnology community, alternative *K. phaffii* strains were investigated. We put forward an  
461 open-access wild type strain, i.e., NCYC 2543 or OPENPichia, as well as two derivatives: a  
462 histidine-auxotrophic strain and a *HOC1*-truncated strain with an improved transformation  
463 efficiency. Moreover, a compatible genetic engineering toolkit is made available, which contains  
464 all the necessary components for the expression of recombinant proteins and which can be easily  
465 expanded with more genetic parts to fit the researcher's needs. This toolkit can be obtained with  
466 an open-usage MTA from the GeneCorner plasmid collection, but it can also be assembled from  
467 scratch, based on the sequences provided in the Supplementary Files 2.

468 It was shown that the proposed alternative OPENPichia strain (NCYC 2543) and its derivatives  
469 are almost identical to the common NRRL Y-11430 strain. Only a handful of mutations could be  
470 identified in our direct comparative genome analysis, of which only 4 are protein coding-altering  
471 (SNPs and indels). Additionally, OPENPichia does not contain the undesired killer plasmids and  
472 the strain shows the same maximum growth rate under the tested conditions. With respect to the  
473 protein production capacity, the data presented here demonstrate that small differences can occur  
474 between the *K. phaffii* type strain NCYC 2543/OPENPichia and NRRL Y-11430, but that there is  
475 no consistently better performing strain, considering the variety of proteins tested in this study.  
476 Previously, Brady et al<sup>24</sup>, performed a similar experiment where NRRL Y-11430 showed to have  
477 the highest protein expression level as compared to a series of other *K. phaffii* strains. However,  
478 none of the type strains from which NRRL Y-11430 directly derives were included in this study;  
479 instead, Y-12729 and Y-48124 (amongst others) were included, which are all members of Cluster  
480 1 of their transcriptomics experiment. Y-7556 and YB-4290, which are type strains like NCYC  
481 2543, are members of the transcriptomics Cluster 2, and would have allowed a better comparison.  
482 Due to the increased cell wall robustness and reduced transformation efficiencies of the type  
483 strains, they were excluded from the protein expression comparison in that study. Indeed, we also



484 observed that the transformation efficiency of the NCYC 2543 strain is dramatically lower as  
485 compared to NRRL Y-11430. However, we could completely overcome this after our discovery  
486 by more in-depth genome resequencing that NRRL Y-11430 has a truncating frameshift mutation  
487 in the *HOC1* cell wall synthesis gene. We introduced the same frameshift mutations in *HOC1* of  
488 OPENPichia, resulting in an even improved transformation efficiency as compared to NRRL  
489 Y-11430. Hoc1p is part of one of two Golgi mannan polymerase complexes that in *S. cerevisiae*  
490 also contains Anp1p, Mnn9p, Mnn10p and Mnn11p<sup>51</sup>, and which mediates elongation of the  
491  $\alpha$ -1,6-mannan backbone that is initiated by the activity of Och1p. In *S. cerevisiae*, *HOC1* has  
492 synthetic positive genetic interactions with the *PKC1* pathway that mediates responses to cell wall  
493 stress, as well as genetic interactions with a multitude of genes involved in cell wall integrity,  
494 protein secretion, vesicular transport, all key pathways in the yeast cell wall maintenance<sup>52</sup>.  
495 Indeed, we observed a lower cell wall mannoprotein N-glycan mannosylphosphorylation density,  
496 which is a sensitive hallmark of cell wall stress. The truncated Hoc1p that is produced in NRRL  
497 Y-11430 vs. the type strain still has the alpha-helical N-terminal luminal protein regions that  
498 type II Golgi proteins typically use to space their catalytic domains away from the membrane, and  
499 to interact with other Golgi proteins of similar topology. As Hoc1p forms part of such multi-protein  
500 complex, we hypothesize that the truncated *Hoc1* allele maintains assembly of this complex but  
501 lacks its own catalytic activity (see AlphaFold 2 model of the protein in Supplementary Figure 4).  
502 In this way, likely a milder phenotype is obtained than with full *HOC1* deletion, making the *hoc1<sup>tr</sup>*  
503 strains grow equally well as the wild type.

504 Interestingly, under pGAP expression conditions, NRRL Y-11430 has somewhat more HCPs in  
505 its culture supernatant and grows to a lower cell culture density as compared to OPENPichia. We  
506 hypothesize that both observations are related and due to slightly increased cell lysis in NRRL  
507 Y-11430, which can have an impact on the need for additional purification steps. Whether the  
508 *hoc1<sup>tr</sup>* mutation in OPENPichia has the same effect remains to be determined.

509 The *K. phaffii* strain that is proposed here as OPENPichia is one deposit of the type strain which  
510 is widely available in many culture collections in different countries (see Global Catalogue of  
511 Microorganisms)<sup>53</sup>. For instance, strain CBS 2612 also does not have killer plasmids and is  
512 identical but for a few drift mutations. If a *Pichia*-user is an end-user and wishes to merely  
513 manufacture a product in these type strains, multiple culture collections provide cost-effective  
514 licenses. However, for labs who are developing improved *Pichia* technology and implement these  
515 novel inventions in the strains, strains have to be distributable to other laboratories, and this is  
516 most often not allowed by the MTAs even of the public strain collections. NCYC should be  
517 commended for uniquely transparently providing cost-effective resale/redistribution as well as

518 commercial manufacturing use licenses as part of standard culture collection practice, fulfilling an  
519 essential need for yeast-based technology developers.

520 More broadly, our study illustrates the need to build ‘generic’ biotechnological platforms after  
521 patents on these foundational inventions of our field expire, much in the same way as  
522 ‘generic/biosimilar’ medicines need to be developed to increase access to more affordable  
523 medicines. We have previously also accomplished this for the HEK293 cell lineage that is used  
524 for viral vector and vaccine manufacturing and hope that others will join us in such open science  
525 endeavours for other synthetic biology ‘chassis’ systems<sup>54</sup>. For now, we invite all *Pichia*  
526 researchers and users to contribute to this OPENPichia resource and make best use of it.

527

## 528 **Materials & Methods**

### 529 **Strains and Media**

530 The wild type *K. phaffii* strains NRRL YB-4290, NRRL Y-7556 and NRRL Y-11430 were obtained  
531 from the Agricultural Research Service (ARS, USA), CBS 2612 was obtained from Westerdijk  
532 Institute (Netherlands) and NCYC 2543 was obtained from the National Collection of Yeast  
533 Cultures (NCYC, UK). All mentioned strains were cultured and maintained on YPD or YPD agar.

534 All entry vectors and expression vectors were propagated and are available in the *E. coli* DH5 $\alpha$   
535 strain. MC1061 and MC1061 $\lambda$  strains were used successfully as well and generally showed  
536 higher transformation efficiency and easier green-white or red-white screening than was the case  
537 for DH5 $\alpha$ . All *E. coli* strains were cultured and maintained on LB agar.

538 Antibiotics were used in the following concentrations for selection in *E. coli*: Zeocin 50  $\mu$ g/ml,  
539 Nourseothricin 50  $\mu$ g/ml, Hygromycin 50  $\mu$ g/ml, Kanamycin 50  $\mu$ g/ml, Chloramphenicol 50  $\mu$ g/ml  
540 and Carbenicillin 50  $\mu$ g/ml. Antibiotics were used in the following concentrations for selection in  
541 *Pichia*: Zeocin 100  $\mu$ g/ml, Nourseothricin 100  $\mu$ g/ml, Hygromycin 100  $\mu$ g/ml, Geneticin 100  $\mu$ g/ml,  
542 Blastidicin 100  $\mu$ g/ml.

543 Several media were used: LB (1% Tryptone, 0.5% Yeast Extract, 0.5% NaCl), YPD (1% Yeast  
544 Extract, 2% Peptone, 2% D-glucose), YPG (1% Yeast Extract, 2% Peptone, 1% Glycerol), BMY  
545 (1% Yeast Extract, 2% Peptone, 1,34% YNB without amino acids, 100 mM Potassium phosphate  
546 buffer pH6), BMGY (BMY with 1% Glycerol), BMDY (BMY with 2% D-glucose), BMMY (BMY with  
547 1% Methanol), and limiting glucose (1% Yeast Extract, 2% Peptone, 100mM Potassium  
548 phosphate buffer pH6, 50g/l Espresso EnPump substrate, 5ml/l Espresso EnPump enzyme  
549 solution (Espresso GmbH, Germany)). For plates, 1.5% agar was added for LB media and 2%  
550 for YPD media; when Zeocin selection was used, media were set to pH7.5.

551 All oligonucleotides and synthetic DNA fragments were ordered at Integrated DNA Technologies  
552 (IDT), Leuven, Belgium. All synthetic DNA fragments (gBlocks® and Genes®) were designed and  
553 adapted for synthesis using the Codon Optimization Tool and the gBlocks Gene Fragments Entry  
554 Tool available at the website of IDT Europe.

### 555 **Illumina sequencing**

556 The strains were cultured overnight in YPD medium and the genomic DNA was extracted using  
557 the Epicentre MasterPure™ Yeast DNA Purification Kit. Sample preparation (DNA fragmentation,  
558 adapter ligation, size selection and amplification) and next generation sequencing (5M 150bp  
559 paired end reads) was done by Eurofins, using Illumina technology. The reads were checked for  
560 quality using fastqc<sup>55</sup>, from which the %GC and number of reads was obtained. From the number  
561 of reads, the average overall coverage was calculated with the formula

$$562 \frac{\#reads \times read\ length\ (in\ bp)}{length\ of\ genomic\ DNA + mitochondrial\ DNA\ (in\ bp)}$$

### 563 *NGS analysis*

564 The reads were trimmed using Trimmomatic<sup>56</sup> to remove adapter, leading and trailing low quality  
565 bases (cut off quality 3), low quality reads (4-base sliding window quality below 15) and reads  
566 below 100 bp. Next, the reads were aligned to a reference and the mutations were identified using  
567 Breseq<sup>27</sup> in consensus mode. As reference, the genome sequence published by Sturmberger *et.*  
568 *al.*<sup>26</sup> was used. The reference sequences for killer plasmids and the mitochondrial DNA were  
569 obtained from Sturmberger *et. al.*<sup>26</sup> and Brady *et. al.*<sup>17</sup>, respectively. The reported coverage depth  
570 was calculated by the Breseq algorithm. This is done by fitting a negative binomial distribution to  
571 the read coverage depth observed at unique reference positions. The mean of this binomial fit is  
572 used as the coverage depth. The killer plasmid copy number was estimated by comparing their  
573 coverage depth with the average of the four chromosomes. The coverage depth for each molecule  
574 was calculated as the mean of a binomial fit for the coverage depth for each reference position.

### 575 *Phylogenetic tree*

576 In order to make a phylogenetic tree, the sequencing data from this study was combined with the  
577 raw reads that were published before<sup>24</sup> and also aligned as described above. From the predicted  
578 mutations of both datasets, a whole genome alignment was constructed from which a  
579 phylogenetic tree was calculated using the Mega X<sup>57</sup> software package. A maximum likelihood  
580 algorithm was used with an HKY substitution matrix.

### 581 **Creation of the NCYC2543 *his4* strain**

582 The NCYC2543 *his4* strain was generated using the split-marker method that was described  
583 previously by Heiss *et al.*<sup>58</sup>. The homology arms of the *HIS4* gene were selected from Näätsaari

584 *et al.*<sup>59</sup>, and the reference genome of the CBS7435 strain. First, a construct containing the two  
585 homology arms with a floxed Nourseothricin acetyltransferase marker was created. Next two  
586 overlapping fragments containing one of the homologies and a part of the antibiotic marker were  
587 generated by PCR using Taq polymerase (Promega), which overlap for a length of 594 bp. These  
588 fragments were purified by a phenol chloroform precipitation. In brief, after adding an equal  
589 volume of phenol:chloroform:isoamyl alcohol (25:24:1), the solution was mixed, centrifuged  
590 (5 min at 12,000 g) and the liquid phase was isolated by decanting. To this, 1/10<sup>th</sup> volume of 3 M  
591 sodium acetate pH 5.5 and 2 volumes of 100% ethanol was added and the sample was mixed  
592 and centrifuged (15 min at 12,000 g). Afterwards, the pellet, containing the amplified DNA, was  
593 isolated, washed with 70% ethanol, air-dried, and resuspended in water.

594 Both purified fragments were transformed into NCYC 2543 competent cells by electroporation  
595 and transformants were streaked to single clone onto YPD plates containing Nourseothricin and  
596 grown for 2 days at room temperature. The resulting clones were replica plated onto CSM-his  
597 plates for growth screening and grown for 2 days at room temperature. Strict non-growers were  
598 checked by colony PCR for replacement of the *HIS4* gene with the antibiotic marker cassette.

599 The Nourseothricin acetyltransferase marker was finally removed by transient expression of a  
600 Cre-recombinase. This gene was cloned into a plasmid with an ARS<sup>60</sup> and a Zeocin resistance  
601 cassette, which was then transformed in the *his4* strain. Transformants were incubated overnight  
602 on a YPD plate containing Zeocin and colonies were transferred to YPD plates without antibiotics.  
603 The removal of the antibiotic cassettes of the plasmid and *HIS4* knock-out was verified with replica  
604 plating on YPD containing the respective antibiotics and double-checked via colony PCR.

#### 605 **Creation of the NCYC2543 *hoc1*<sup>tr</sup> strains**

606 The NCYC2543 *hoc1*<sup>tr</sup> strains were generated using the split-marker method as described above.  
607 The left homology arm of the *HOC1* gene was chosen such as to contain about 1 kb upstream of  
608 the premature stop codon. To introduce the single nucleotide deletion, genomic DNA of NRRL  
609 Y-11430 instead of NCYC 2543 was used as the PCR template. The right homology arm was  
610 chosen as to contain about 1 kb downstream of the premature stop codon, also for this PCR,  
611 genomic DNA of NRRL Y-11430 was used, although NCYC 2543 would have also worked. The  
612 left and right homology arms were respectively fused by PCR to the first and last two thirds of the  
613 floxed Nourseothricin acetyltransferase marker. The PCR fragments were purified over gel and  
614 the DNA was recovered using the Wizard SV Gel and PCR Clean-Up System (Promega),  
615 according to the manufacturer's instructions. Both purified fragments were transformed into NCYC  
616 2543 competent cells by electroporation and transformants were streaked to single clone onto  
617 YPD plates containing Nourseothricin and grown for 2 days at room temperature. The resulting  
618 clones were screened using colony PCR using a forward primer annealing upstream of the left

619 homology arm and a reverse primer annealing to the Nourseothricin selection marker. The  
620 Nourseothricin acetyltransferase marker was removed by transient expression of a Cre-  
621 recombinase as described above. The engineered *HOC1* locus was confirmed for both strategies  
622 by colony PCR and Sanger sequencing. The sequences for the PCR primers and split-marker  
623 cassettes can be found in Supplementary Tables 3 and 4.

## 624 **Growth Analysis**

625 The different *Pichia* strains were cultured on YPD agar for 2 days, inoculated in triplicate into a  
626 5 ml preculture of BMDY and grown overnight at 28 °C, shaking at 225 rpm. The optical density  
627 at 600 nm (OD<sub>600</sub>) of each culture was measured and 250 ml of BMDY was inoculated at a starting  
628 OD<sub>600</sub> of 0.05. Samples of 1 ml were immediately isolated from each culture to measure the OD<sub>600</sub>  
629 again. Then, samples of 1 ml were isolated every 2 h for 22 hours and again after 26 hours and  
630 29 hours. All samples were diluted accordingly and measured within an OD<sub>600</sub> range of 0.05 – 1.

## 631 **Recombinant protein expressions**

632 The expression vectors were made using the MoClo toolkit, based on Golden Gate cloning as  
633 described in this paper. Briefly, the protein coding sequences were ordered synthetically with Part  
634 3b type Bsal overhangs (NEB R3733) and cloned into the entry vector with BsmBI (NEB R0739).  
635 Next, expression vectors were made by assembly of the Level 0 parts.

636 The cloning procedure was as follows: 1 µl of T4 DNA Ligase (400 U; NEB M0202), 2 µl of T4  
637 DNA Ligase Buffer (NEB M0202), 1 µl of Restriction Enzyme (20 U) were added to 20 fmoles of  
638 backbone (pPTK081 for entry vectors; any P8 backbone for destination vectors). An excess of  
639 insert (>1000 fmoles of PCR amplicon or synthetic gene; 10 pmoles of annealed oligonucleotides)  
640 was added for a BsmBI assembly, while equimolar amounts (20 fmoles) of each entry vector were  
641 added for a Bsal assembly. BsmBI assembly mixtures were incubated according to the following  
642 protocol: >25 cycles of 42 °C for 2 min (digest) and 16 °C for 5 min (ligation), followed by 60 °C  
643 for 10 min (final digest) and 80 °C for 10 min (heat inactivation step). Bsal assembly mixtures  
644 were incubated similarly, except that the digestion steps were performed at 37 °C.

645 *Pichia* electrocompetent cells were generated, using the lithium acetate method as described by  
646 Wu *et al.*<sup>61</sup>. In brief, precultures were inoculated in 5 ml YPD and grown overnight in an incubator  
647 at 28 °C and 250 rpm. The precultures were diluted and grown to an OD<sub>600</sub> of approximately 1.5.  
648 50 ml of the culture was isolated and the cells were harvested by centrifugation (1,519 g for 5 min  
649 at 4 °C), resuspended in 200 ml of a lithium acetate (LiAc)/dithiothreitol (DTT) solution (100 mM  
650 LiAc, 10 mM DTT, 0.6 M sorbitol, 10 mM Tris-HCl pH 7.5) and incubated for 30 minutes at 28 °C  
651 and 100 rpm. Next, the cells were collected by centrifugation (1,519 g for 5 min at 4 °C), washed  
652 two times with 1 M ice-cold sorbitol and finally resuspended in 1.875 ml of 1 M ice-cold sorbitol.



653 0.5 to 1  $\mu$ g of DNA was added to aliquots of 80  $\mu$ l and electroshocked (1.5kV, 200 $\Omega$ , 25 $\mu$ F).  
654 Immediately, 1 ml of 1 M sorbitol was added and the suspension was incubated at 28 °C for  
655 2-5 h. Next, the cells were plated on YPD agar containing the appropriate antibiotic, and colonies  
656 were isolated after 2 days of incubation at 30 °C.

657 To be able to compare expression, only colonies with single copy integration of the construct were  
658 selected. The copy number was determined by quantitative PCR on a Lightcycler 480 (Roche)  
659 using primers that bind pAOX1 and pGAP. The genes *OCH1* and *ALG9* were used as reference.  
660 Genomic DNA (gDNA) of NCYC 2543 was included as a single copy positive control. A single  
661 copy plasmid integration will yield one additional copy and more than two copies would be the  
662 result of multiple plasmid integrations. Amplification efficiencies were determined using serial  
663 dilutions of gDNA samples. Reactions were set up in 10  $\mu$ l with final concentrations of 300 nM  
664 forward primer, 300 nM reverse primer, 1x SensiFast SYBR no-rox mastermix (Bioline), 10 ng  
665 gDNA and the following cycling conditions: 3 min at 95 °C, followed by 45 cycles of 95 °C for 3 s,  
666 60 °C for 30 s at ramp rate 2.5 °C/s, 72 °C for 1 s, ending with 0.11 °C/s from 65 °C to 95 °C for  
667 melting curve determination (5 acquisitions/s). Copy numbers were calculated using the  
668  $\Delta\Delta$ Ct method<sup>62</sup>.

669 The different strains expressing the recombinant proteins, were cultured on YPD agar plates for  
670 2 days, inoculated in triplicate into a 5 ml preculture of BMDY and grown overnight at 28 °C,  
671 shaking at 225 rpm. Next, the cultures for pAOX1-driven expression, were inoculated in BMDY,  
672 grown for 24 h, subsequently transferred to BMMY and incubated for 48 h. After 24 h in BMMY,  
673 an extra 1% of methanol was added. The cultures for pGAP-driven expression, were instead  
674 inoculated in limiting glucose medium and incubated for 48 h. Then, optical density at 600nm was  
675 measured for all cultures and the supernatant was collected by centrifuging (2,500 g for 5 min).  
676 The samples were incubated with EndoH (produced in-house) to remove N-glycans and analysed  
677 by SDS-PAGE.

#### 678 **ELISA-based quantification of GBP**

679 Nunc MaxiSorp™ 96-well plates were coated with 75 ng/well of penta-His antibody in PBS  
680 solution (Qiagen, 34660) and incubated overnight at 4 °C. Plates were washed three times with  
681 200  $\mu$ l/well of wash buffer (PBS + 0.05% Tween-20) and any residual liquid was removed. Plates  
682 were blocked with 100  $\mu$ l/well Reagent Diluent (1% Probumin (Millipore, 82-045-1) in PBS pH 7.2)  
683 for 2 h. Plates were washed three times with 200  $\mu$ l/well of wash buffer and residual liquid was  
684 removed. Dilutions of the yeast supernatant were prepared in 96-deepwell plates and 100  $\mu$ l of a  
685 100,000-fold dilution was applied to the plates and incubated for 1 hour while shaking gently on  
686 a table top plate shaker. Plates were washed three times with 200  $\mu$ l/well of wash buffer and  
687 residual liquid was removed. Plates were provided with 100  $\mu$ l of a 250 ng/ml MonoRab™ Rabbit



688 Anti-Camelid VHH Antibody coupled to HRP in Reagent Diluent and incubated for 1 hour while  
689 shaking gently on a table top plate shaker. Plates were washed three times with 200  $\mu$ l/well of  
690 wash buffer and residual liquid was removed. TMB substrate was prepared according to the  
691 manufacturer's instructions (BD OptEIA™) and 100  $\mu$ l/well was applied to the plate before  
692 incubating for 10 min. Next, 50  $\mu$ l of stop solution (2N H<sub>2</sub>SO<sub>4</sub>) was added to each well and the  
693 plate was read at 450 nm by a plate reader. Absorbance units were background corrected. All  
694 strains were compared in a Kruskal-Wallis omnibus test, followed by pairwise comparison  
695 corrected with Dunn's multiple comparison procedure.

#### 696 **Transformation efficiency testing**

697 Competent cells were prepared using the lithium acetate method as described above. 200 ng of  
698 linearized plasmid was transformed to each strain and several dilutions of the transformation mix  
699 were plated on either non-selective YPD agar or YPD agar containing 100  $\mu$ g/ml Zeocin. For each  
700 transformation, colonies were counted from the plates where clear individual colonies could be  
701 observed after 2 days at 30 °C incubation. Both the selective and non-selective plates were  
702 counted to correct for a potential difference in the number of competent cells per transformation.

703 A linear model (estimated using ordinary least squares) in the statistical software R was fitted<sup>63</sup>.  
704 As the outcome variable, the log-transformed, normalized transformation efficiency (natural log of  
705 the number of transformants per million clones) and as predictor variables the strain and promotor  
706 type, including an interaction effect were used. The model explains a statistically significant and  
707 substantial proportion of variance ( $R^2=0.94$ ,  $F(7,38)=81.33$ ,  $p<.001$ ,  $\text{adj.}R^2=0.93$ ). Model-  
708 predicted group means with 95% confidence intervals were obtained using the ggeffects package  
709 with heteroscedasticity-consistent variance estimators from the sandwich package (vcovHC, type  
710 HC0)<sup>64,65</sup>. Further, we defined specific contrasts using the multcomp package<sup>66</sup>, again with  
711 heteroscedasticity-consistent variance estimators to obtain multiple-comparison corrected  
712 estimates for the ratios of transformation efficiencies between the different strains and using  
713 different plasmids.

#### 714 **DSA-FACE-based glycan analysis of the cell wall mannoproteins**

715 Strains were inoculated in YPD or YPG, from their respective precultures, at an OD<sub>600</sub> of 0.05 and  
716 grown overnight at 28 °C and 200 rpm. The next day, 500 OD units per strain were pelleted  
717 (10 min at 1,500 g) and the mannoproteins were isolated, as follows. The pellets were washed  
718 three times with Milli-Q, after which 20 mM of citrate buffer pH6.6 was added at 1 ml per 150  $\mu$ g  
719 of wet cell weight. The resuspended cells were autoclaved for 1.5 hours at 120 °C in cryovials  
720 and then centrifuged for 10 min at 16,000 g. To the supernatant fractions, 3 volumes of ice-cold  
721 methanol were added and the vials were incubated for 15 min at 20 °C. The mannoproteins were

722 spun down for 10 min at 16,000 g and the pellets were left to dry until transparent. The pellets  
723 were resuspended in 50 µl RCM buffer (8 M Urea, 360 mM Tris-HCl pH 8.6, 3.2 mM EDTA) and  
724 stored at 4 °C until further analysis.

725 The N-linked oligosaccharides were prepared from the purified mannoproteins upon blotting to  
726 PVDF membrane in the wells of 96-well plate membrane plates, and were analysed by capillary  
727 electrophoresis with laser-induced fluorescence detection (CE-LIF) using an ABI 3130 capillary  
728 DNA sequencer as described previously<sup>36</sup>.

#### 729 **Alcian blue assay**

730 The assay was performed as described previously<sup>37</sup>, with adaptations. Briefly, Alcian blue was  
731 prepared in 0.02 N HCl at a concentration of 63 µg/ml and the solution was centrifuged to remove  
732 insoluble precipitates. An overnight culture of each strain was grown in YPD at 28 °C and  
733 200 rpm. The next day, the cells were pelleted and the supernatant was removed. The cells were  
734 washed with 0.02 N HCl and the pellet was resuspended again in 0.02 N HCl to an OD<sub>600</sub> of  
735 10 OD/ml. 100 µl (1 OD<sub>600</sub>) of cells was transferred to a 96-V-bottom plate to which 100 µl of the  
736 Alcian blue solution was added. After 15 min of incubation at room temperature, the plate was  
737 centrifuged for 15 min at 3,220 g, after which the pellets were visually checked.

#### 738 **Congo red and Calcofluor white test**

739 The test was performed as described elsewhere<sup>67</sup>, with slight adaptations. Briefly, the strains were  
740 grown overnight in BMGY. The next day, dilutions were made in order to obtain 10E5 to 10E1  
741 cells in 5 µl BMGY. 5 µl drops were spotted on the different plates and the plates were incubated  
742 for 3 days at 30 °C. Congo red (Sigma, C6767) and Calcofluor white (Fluka, 18909) were present  
743 at final concentrations of 75 µg/ml and 10 µg/ml, respectively.

#### 744 **Electron microscopy**

##### 745 *Transmission electron microscopy*

746 The strains were cultivated in BMGY at 28 °C and 200 rpm, overnight. High Pressure Freezing,  
747 as described previously<sup>68</sup>, was carried out in a high-pressure freezer (Leica EM ICE; Leica  
748 Microsystems, Vienna, Austria). Cells were pelleted and frozen as a paste in 150 µm copper  
749 carriers. HPF was followed by Quick Freeze Substitution as described previously<sup>69</sup>. Briefly,  
750 carriers were placed on top of the frozen FS solution inside a cryovial containing 1% ddH<sub>2</sub>O,  
751 1% OsO<sub>4</sub> and 0.5% glutaraldehyde in dried acetone. After reaching 4 °C for 30 min, samples were  
752 infiltrated stepwise over three days at 0-4 °C in Spurr's resin and embedded in capsules. The  
753 polymerization was performed at 70 °C for 16 h. Ultrathin sections of a gold interference colour

754 were cut using an ultra-microtome (Leica EM UC6), followed by a post-staining in a Leica EM  
755 AC20 for 40 min in uranyl acetate at 20 °C and for 10 min in lead stain at 20 °C.

756 Sections were collected on formvar-coated copper slot grids. Grids were viewed with a JEM-  
757 1400Plus transmission electron microscope (JEOL, Tokyo, Japan) operating at 60 kV.

#### 758 *Scanning electron microscopy*

759 The strains were cultivated in BMGY at 28 °C and 200 rpm, overnight. Cells were fixed overnight  
760 in 1.5% Paraformaldehyde, 3% Glutaraldehyde in 0.05 M Na-Cacodylate buffer pH7.4. The fixed  
761 cells were centrifuged for 2 min at 1,000 g between each following step. First the cells were  
762 washed 3 times with 0.1 M Na-Cacodylate buffer pH7.4 and then incubated for 30 min in 2% OsO<sub>4</sub>  
763 in 0.1 M Na-Cacodylate pH7.4. Osmicated samples were washed 3 times with Milli-Q, prior to a  
764 stepwise ethanol dehydration (50%, 70%, 90%, 2 x 100%). Samples were incubated twice in  
765 hexamethyldisilazane (HMDS) solution (Sigma-Aldrich), as a final dehydration step, after which  
766 they were spotted on silicon grids (Ted Pella) and air-dried overnight at room temperature.  
767 Samples were next coated with 5 nm Platinum (Pt) in a Quorum Q 150T ES sputter coater  
768 (Quorum Technologies) and placed in a Gemini 2 Cross beam 540 microscope from Zeiss for  
769 SEM imaging at 1.50 kV using a SE2 detector.

770

#### 771 **Associated content**

- 772 • All plasmids from the modular cloning kit are available at the Belgian Co-ordinated  
773 Collections of Micro-organisms (BCCM)/GeneCorner Plasmid Collection  
774 (<http://bccm.belspo.be/about-us/bccm-genecorner>).
- 775 • All raw reads of the genomes sequenced in this study have been submitted to NCBI and  
776 can be found under the following accession numbers: NRRL Y-11430 (SAMN32067769),  
777 NRRL YB-4290 (SAMN32067770), NRRL Y-7556 (SAMN32067773), NCYC 2543  
778 (SAMN32067771), CBS 2612 (SAMN32067772).
- 779 • Supplementary Figure 1: Summary of the end-ODs of the pGAP- and pAOX1-based  
780 cultivations at harvest.
- 781 • Supplementary Figure 2: DSA-FACE profiles of the cell wall mannoproteins of the different  
782 strains grown on YPD or YPG.
- 783 • Supplementary Figure 3: Overview of the available elements for the different parts of the  
784 MoClo toolbox.
- 785 • Supplementary Figure 4: AlphaFold 2 models of the type strain Hoc1p and of the NRRL  
786 Y-11430 lineage derived strain.

- 787 • Supplementary Table 1: Overview of the NGS results, including the number of reads, GC%  
788 and average overall coverage.
- 789 • Supplementary Table 2: Proportion of NGS reads mapping to different molecules of the  
790 reference genome, mitochondrial DNA and killer plasmids.
- 791 • Supplementary Table 3: List of oligonucleotides that were used as primers for PCR, cPCR  
792 or sequencing.
- 793 • Supplementary Table 4. Sequences of the split-marker fragments used to generate the two  
794 *HOC1* mutants.
- 795 • Supplementary File 1: GenBank files of the expression constructs used in the study.
- 796 • Supplementary File 2: FASTA files of the available MoClo Parts.

797

### 798 **Author Information**

799 This work was originally conceived and initiated by DVH, KV and NC. DVH, RV, KV, SV, EW,  
800 BVM, HE, DF, HG, CL, GM, LM, JN, CR, LVS, and KC performed experiments and contributed  
801 to data analysis and/or results presentation. RDR, MDB and PB performed the electron  
802 microscopy. DVH, RV, KC and NC cowrote the manuscript, while KC and NC supervised the  
803 work.

804

### 805 **Acknowledgements**

806 DVH was supported by a Baekeland mandate of VLAIO (Flanders Innovation & Entrepreneurship  
807 fund) in collaboration with Inbiose NV, and is now an employee of Inbiose NV. RV was supported  
808 by a Strategic Basic Research fellowship from the Fund for Scientific Research and otherwise  
809 supported by Ghent University and is now an employee of Those Vegan Cowboys. KV was a VIB  
810 post-doctoral fellow and is now employee of Inbiose NV. SV and EW are employees of the Ghent  
811 University. HE is supported by a Fundamental Research fellowship of the Fund for Scientific  
812 Research Flanders (FWO). HG was a post-doctoral fellow funded by the Ghent University and  
813 VIB and is now an employee of Eurofins. CL was supported by a Strategic Basic Research  
814 fellowship of the Fund for Scientific Research Flanders (FWO) and is now an employee of Exevir.  
815 LM and DF are staff scientists of the VIB Center for Medical Biotechnology. GM was supported  
816 by VIB and now works at Animab. JN, CR and BVM are supported by Strategic Basic Research  
817 fellowships of the Fund for Scientific Research Flanders (FWO). LVS is a VIB post-doctoral fellow  
818 and supported by grants from the Industrial Research Fund of Ghent University, VLAIO and the  
819 European Commission (HERA-Pilot). RDR, MDB and PB are employees of VIB. KC is supported  
820 by an Innovation Mandate of VLAIO. Research in the Callewaert lab is supported by grants from

821 UGent, the Fund for Scientific Research Flanders (FWO) and core resources from VIB. We want  
822 to thank Joeri Beauprez for valuable discussions; and Erhan Çıtak, Merve Arslan, Annelies Van  
823 Hecke and Simon Devos for assistance with some of the experiments.

824

## 825 **References**

- 826 1. Licences | National Collection of Yeast Cultures. <https://www.ncyc.co.uk/licences>.
- 827 2. Karbalaei, M., Rezaee, S. A. & Farsiani, H. *Pichia pastoris*: A highly successful expression  
828 system for optimal synthesis of heterologous proteins. *J Cell Physiol* jcp.29583 (2020)  
829 doi:10.1002/jcp.29583.
- 830 3. Adivitiya, Dagar, V. K. & Khasa, Y. P. Yeast Expression Systems: Current Status and Future  
831 Prospects. in *Yeast Diversity in Human Welfare* (eds. Satyanarayana, T. & Kunze, G.) 215–  
832 250 (Springer Singapore, 2017). doi:10.1007/978-981-10-2621-8\_9.
- 833 4. Yang, Z. & Zhang, Z. Engineering strategies for enhanced production of protein and bio-  
834 products in *Pichia pastoris*: A review. *Biotechnology Advances* **36**, 182–195 (2018).
- 835 5. Baumschabl, M. *et al.* Conversion of CO<sub>2</sub> into organic acids by engineered autotrophic yeast.  
836 *Proc Natl Acad Sci U S A* **119**, e2211827119 (2022).
- 837 6. Liu, L. *et al.* How to achieve high-level expression of microbial enzymes: strategies and  
838 perspectives. *Bioengineered* **4**, 212–223 (2013).
- 839 7. Gasser, B. *et al.* *Pichia pastoris*: protein production host and model organism for biomedical  
840 research. *Future Microbiology* **8**, 191–208 (2013).
- 841 8. Phaff, H. J., Miller, M. W. & Shifrine, M. The taxonomy of yeasts isolated from *Drosophila* in  
842 the Yosemite region of California. *Antonie van Leeuwenhoek* **22**, 145–161 (1956).
- 843 9. Phaff, H. J. A proposal for amendment of the diagnosis of the genus *Pichia hansen*. *Antonie*  
844 *van Leeuwenhoek* **22**, 113–116 (1956).
- 845 10. Yamada, Y., Matsuda, M., Maeda, K. & Mikata, K. The Phylogenetic Relationships of  
846 Methanol-assimilating Yeasts Based on the Partial Sequences of 18S and 26S Ribosomal  
847 RNAs: The Proposal of *Komagataella* Gen. Nov. (Saccharomycetaceae). *Bioscience,*  
848 *Biotechnology, and Biochemistry* **59**, 439–444 (1995).
- 849 11. Kurtzman, C. P. Description of *Komagataella phaffii* sp. nov. and the transfer of *Pichia*  
850 *pseudopastoris* to the methylotrophic yeast genus *Komagataella*. *INTERNATIONAL*  
851 *JOURNAL OF SYSTEMATIC AND EVOLUTIONARY MICROBIOLOGY* **55**, 973–976 (2005).
- 852 12. Ogata, K., Nishikawa, H. & Ohsugi, M. A yeast capable of utilizing methanol. *Agricultural and*  
853 *biological chemistry* **33**, 1519–1520 (1969).
- 854 13. Tani, Y., Miya, T., Nishikawa, H. & Ogata, K. The Microbial Metabolism of Methanol: Part I.  
855 Formation and Crystallization of Methanol-oxidizing Enzyme in a Methanol-utilizing Yeast,  
856 *Kloeckera* sp. No. 2201 Part II. Properties of Crystalline Alcohol Oxidase from *Kloeckera* sp.  
857 No. 2201. *Agricultural and Biological Chemistry* **36**, 68–83 (1972).
- 858 14. TANI, Y., MIYA, T. & OGATA, K. The microbial metabolism of methanol Part II. *Agricultural*  
859 *and Biological Chemistry* **36**, 76–83 (1972).
- 860 15. Wegner Eugene Herman. A Process For Producing Single Cell Protein Material And Culture.  
861 (1980).
- 862 16. Kurtzman, C. P. Biotechnological strains of *Komagataella (Pichia) pastoris* are *Komagataella*  
863 *phaffii* as determined from multigene sequence analysis. *J Ind Microbiol Biotechnol* **36**, 1435–  
864 1438 (2009).
- 865 17. Love, K. R. *et al.* Comparative genomics and transcriptomics of *Pichia pastoris*. *BMC*  
866 *genomics* **17**, 550 (2016).



- 867 18. De Schutter, K. *et al.* Genome sequence of the recombinant protein production host *Pichia*  
868 *pastoris*. *Nature biotechnology* **27**, 561 (2009).
- 869 19. Sturmberger, L. *et al.* Refined *Pichia pastoris* reference genome sequence. *Journal of*  
870 *biotechnology* **235**, 121–131 (2016).
- 871 20. Mattanovich, D. *et al.* Open access to sequence: browsing the *Pichia pastoris* genome.  
872 *Microbial cell factories* **8**, 53 (2009).
- 873 21. *Pichia* Technology from RCT. <https://pichia.com/>.
- 874 22. Gasser, B. *et al.* *Pichia pastoris* : protein production host and model organism for biomedical  
875 research. *Future Microbiology* **8**, 191–208 (2013).
- 876 23. Fischer, J. E. & Glieder, A. Current advances in engineering tools for *Pichia pastoris*. *Current*  
877 *Opinion in Biotechnology* **59**, 175–181 (2019).
- 878 24. Brady, J. R. *et al.* Comparative genome-scale analysis of *Pichia pastoris* variants informs  
879 selection of an optimal base strain. *Biotechnology and Bioengineering* **117**, 543–555 (2020).
- 880 25. Prielhofer, R. *et al.* GoldenPiCS: a Golden Gate-derived modular cloning system for applied  
881 synthetic biology in the yeast *Pichia pastoris*. *BMC Syst Biol* **11**, 123 (2017).
- 882 26. Sturmberger, L. *et al.* Refined *Pichia pastoris* reference genome sequence. *Journal of*  
883 *Biotechnology* **235**, 121–131 (2016).
- 884 27. Deatherage, D. E. & Barrick, J. E. Identification of Mutations in Laboratory-Evolved Microbes  
885 from Next-Generation Sequencing Data Using breseq. in *Engineering and Analyzing*  
886 *Multicellular Systems* (eds. Sun, L. & Shou, W.) vol. 1151 165–188 (Springer New York,  
887 2014).
- 888 28. Braun-Galleani, S. *et al.* *Tetrad analysis without tetrad dissection: Meiotic recombination and*  
889 *genomic diversity in the yeast Komagataella phaffii* (*Pichia pastoris*).  
890 <http://biorxiv.org/lookup/doi/10.1101/704627> (2019) doi:10.1101/704627.
- 891 29. Offei, B. *et al.* Identification of genetic variants of the industrial yeast *Komagataella phaffii*  
892 (*Pichia pastoris*) that contribute to increased yields of secreted heterologous proteins. *PLoS*  
893 *Bio* **20**, (2022).
- 894 30. Lu, L., Roberts, G. G., Oszust, C. & Hudson, A. P. The YJR127C/ZMS1 gene product is  
895 involved in glycerol-based respiratory growth of the yeast *Saccharomyces cerevisiae*. *Current*  
896 *genetics* **48**, 235–246 (2005).
- 897 31. Jungmann, J. & Munro, S. Multi-protein complexes in the cis Golgi of *Saccharomyces*  
898 *cerevisiae* with alpha-1,6-mannosyltransferase activity. *EMBO J* **17**, 423–434 (1998).
- 899 32. Braun-Galleani, S. *et al.* Genomic diversity and meiotic recombination among isolates of the  
900 biotech yeast *Komagataella phaffii* (*Pichia pastoris*). *Microb Cell Fact* **18**, 211 (2019).
- 901 33. Fairhead, C., Llorente, B., Denis, F., Soler, M. & Dujon, B. New vectors for combinatorial  
902 deletions in yeast chromosomes and for gap-repair cloning using ‘split-marker’ recombination.  
903 *Yeast* **12**, 1439–1457 (1996).
- 904 34. Heiss, S., Maurer, M., Hahn, R., Mattanovich, D. & Gasser, B. Identification and deletion of  
905 the major secreted protein of *Pichia pastoris*. *Appl Microbiol Biotechnol* **97**, 1241–1249  
906 (2013).
- 907 35. Vogl, T., Gebbie, L., Palfreyman, R. W. & Speight, R. Effect of Plasmid Design and Type of  
908 Integration Event on Recombinant Protein Expression in *Pichia pastoris*. *Appl Environ*  
909 *Microbiol* **84**, e02712-17, [/aem/84/6/e02712-17.atom](https://doi.org/10.1128/aem.84.6.e02712-17) (2018).
- 910 36. Laroy, W., Contreras, R. & Callewaert, N. Glycome mapping on DNA sequencing equipment.  
911 *Nat Protoc* **1**, 397–405 (2006).
- 912 37. Conde, R., Pablo, G., Cueva, R. & Larriba, G. Screening for new yeast mutants affected in  
913 mannosylphosphorylation of cell wall mannoproteins. *Yeast* **20**, 1189–1211 (2003).
- 914 38. Friis, J. & Ottolenghi, P. The genetically determined binding of alcian blue by a minor fraction  
915 of yeast cell walls. *C R Trav Lab Carlsberg* **37**, 327–341 (1970).



- 916 39. Casini, A., Storch, M., Baldwin, G. S. & Ellis, T. Bricks and blueprints: methods and standards  
917 for DNA assembly. *Nat Rev Mol Cell Biol* **16**, 568–576 (2015).
- 918 40. Moore, S. J. *et al.* EcoFlex: A Multifunctional MoClo Kit for *E. coli* Synthetic Biology. *ACS*  
919 *Synth. Biol.* **5**, 1059–1069 (2016).
- 920 41. Lee, M. E., DeLoache, W. C., Cervantes, B. & Dueber, J. E. A Highly Characterized Yeast  
921 Toolkit for Modular, Multipart Assembly. *ACS Synth. Biol.* **4**, 975–986 (2015).
- 922 42. van Dolleweerd, C. J. *et al.* MIDAS: A Modular DNA Assembly System for Synthetic Biology.  
923 *ACS Synth. Biol.* **7**, 1018–1029 (2018).
- 924 43. Hernanz-Koers, M. *et al.* FungalBraid: A GoldenBraid-based modular cloning platform for the  
925 assembly and exchange of DNA elements tailored to fungal synthetic biology. *Fungal*  
926 *Genetics and Biology* **116**, 51–61 (2018).
- 927 44. Sarrion-Perdigones, A. *et al.* GoldenBraid: An Iterative Cloning System for Standardized  
928 Assembly of Reusable Genetic Modules. *PLoS ONE* **6**, e21622 (2011).
- 929 45. Obst, U., Lu, T. K. & Sieber, V. A Modular Toolkit for Generating *Pichia pastoris* Secretion  
930 Libraries. *ACS Synth. Biol.* **6**, 1016–1025 (2017).
- 931 46. Andreou, A. I. & Nakayama, N. Mobius Assembly: A versatile Golden-Gate framework  
932 towards universal DNA assembly. *PLoS ONE* **13**, e0189892 (2018).
- 933 47. Engler, C. *et al.* A Golden Gate Modular Cloning Toolbox for Plants. *ACS Synth. Biol.* **3**, 839–  
934 843 (2014).
- 935 48. Weber, E., Engler, C., Gruetzner, R., Werner, S. & Marillonnet, S. A Modular Cloning System  
936 for Standardized Assembly of Multigene Constructs. *PLoS ONE* **6**, e16765 (2011).
- 937 49. Potapov, V. *et al.* Comprehensive Profiling of Four Base Overhang Ligation Fidelity by T4  
938 DNA Ligase and Application to DNA Assembly. *ACS Synth Biol* **7**, 2665–2674 (2018).
- 939 50. OPENPichia plasmid set | BCCM Belgian Coordinated Collections of Microorganisms.  
940 <https://bccm.belspo.be/catalogues/plasmid-sets/openpichia>.
- 941 51. Jungmann, J., Rayner, J. C. & Munro, S. The *Saccharomyces cerevisiae* protein  
942 Mnn10p/Bed1p is a subunit of a Golgi mannosyltransferase complex. *J Biol Chem* **274**, 6579–  
943 6585 (1999).
- 944 52. HOC1 Interactions | SGD. <https://www.yeastgenome.org/locus/S000003836/interaction>.
- 945 53. Wu, L. *et al.* Global catalogue of microorganisms (gcm): a comprehensive database and  
946 information retrieval, analysis, and visualization system for microbial resources. *BMC*  
947 *Genomics* **14**, 933 (2013).
- 948 54. Lin, Y.-C. *et al.* Genome dynamics of the human embryonic kidney 293 lineage in response  
949 to cell biology manipulations. *Nat Commun* **5**, 4767 (2014).
- 950 55. Andrews, S. *FastQC: A Quality Control Tool for High Throughput Sequence Data. Available*  
951 *online at: <http://www.bioinformatics.babraham.ac.uk/projects/fastqc/>.* (2010).
- 952 56. Bolger, A. M., Lohse, M. & Usadel, B. Trimmomatic: a flexible trimmer for Illumina sequence  
953 data. *Bioinformatics* **30**, 2114–2120 (2014).
- 954 57. Kumar, S., Stecher, G., Li, M., Knyaz, C. & Tamura, K. MEGA X: Molecular Evolutionary  
955 Genetics Analysis across Computing Platforms. *Molecular Biology and Evolution* **35**, 1547–  
956 1549 (2018).
- 957 58. Heiss, S., Maurer, M., Hahn, R., Mattanovich, D. & Gasser, B. Identification and deletion of  
958 the major secreted protein of *Pichia pastoris*. *Applied microbiology and biotechnology* **97**,  
959 1241–1249 (2013).
- 960 59. Näätäsaari, L. *et al.* Deletion of the *Pichia pastoris* KU70 Homologue Facilitates Platform Strain  
961 Generation for Gene Expression and Synthetic Biology. *PLoS ONE* **7**, e39720 (2012).
- 962 60. Weninger, A., Hatzl, A.-M., Schmid, C., Vogl, T. & Glieder, A. Combinatorial optimization of  
963 CRISPR/Cas9 expression enables precision genome engineering in the methylotrophic yeast  
964 *Pichia pastoris*. *Journal of Biotechnology* **235**, 139–149 (2016).

- 965 61. Wu, S. & Letchworth, G. J. High efficiency transformation by electroporation of *Pichia pastoris*  
966 pretreated with lithium acetate and dithiothreitol. *BioTechniques* **36**, 152–154 (2004).
- 967 62. Livak, K. J. & Schmittgen, T. D. Analysis of relative gene expression data using real-time  
968 quantitative PCR and the 2(-Delta Delta C(T)) Method. *Methods* **25**, 402–408 (2001).
- 969 63. R: The R Project for Statistical Computing. <https://www.r-project.org/>.
- 970 64. Lüdtke, D. ggeffects: Tidy Data Frames of Marginal Effects from Regression Models. *The*  
971 *Journal of Open Source Software* **3**, (2018).
- 972 65. Zeileis, A., Köll, S. & Graham, N. Various Versatile Variances: An Object-Oriented  
973 Implementation of Clustered Covariances in R. *Journal of Statistical Software* **95**, 1–36  
974 (2020).
- 975 66. Hothorn, T., Bretz, F. & Westfall, P. Simultaneous inference in general parametric models.  
976 *Biom J* **50**, 346–363 (2008).
- 977 67. Ram, A. F. J. & Klis, F. M. Identification of fungal cell wall mutants using susceptibility assays  
978 based on Calcofluor white and Congo red. *Nat Protoc* **1**, 2253–2256 (2006).
- 979 68. Arendt, P. *et al.* An endoplasmic reticulum-engineered yeast platform for overproduction of  
980 triterpenoids. *Metab Eng* **40**, 165–175 (2017).
- 981 69. McDonald, K. L. & Webb, R. I. Freeze substitution in 3 hours or less. *J Microsc* **243**, 227–233  
982 (2011).
- 983 70. Walter, M. R. *et al.* Three-dimensional structure of recombinant human granulocyte-  
984 macrophage colony-stimulating factor. *Journal of Molecular Biology* **224**, 1075–1085 (1992).
- 985 71. Wrapp, D. *et al.* Structural Basis for Potent Neutralization of Betacoronaviruses by Single-  
986 Domain Camelid Antibodies. *Cell* **181**, 1004–1015.e15 (2020).
- 987 72. Yang, Z. *et al.* A Novel Multivalent, Single-Domain Antibody Targeting TcdA and TcdB  
988 Prevents Fulminant *Clostridium difficile* Infection in Mice. *The Journal of Infectious Diseases*  
989 **210**, 964–972 (2014).
- 990 73. McPherson, M. J. *et al.* Galactose oxidase of *Dactylium dendroides*. Gene cloning and  
991 sequence analysis. *Journal of Biological Chemistry* **267**, 8146–8152 (1992).
- 992 74. Kubala, M. H., Kovtun, O., Alexandrov, K. & Collins, B. M. Structural and thermodynamic  
993 analysis of the GFP:GFP-nanobody complex. *Protein Science* **19**, 2389–2401 (2010).
- 994

995 **Tables**

996  
997  
998  
999  
1000

**Table 1. Strains used in this publication.** \* Type strain; Abbreviations: UCD: University of California, Davis, USA; CBS: Centraalbureau voor Schimmelculturen, currently known as Westerdijk Fungal Biodiversity Institute, The Netherlands; NCYC: National Collection of Yeast Cultures, UK; NRRL: Northern Regional Research Laboratory, currently known as Agricultural Research Service (ARS), USA; NTG: nitrosoguanidine.

| Strain ID                            | Origin of strain isolate                   | Source                          | Original depositor                                 |
|--------------------------------------|--------------------------------------------|---------------------------------|----------------------------------------------------|
| CBS 2612 *                           | <i>Quercus kelloggii</i> (California, USA) | CBS culture collection          | HJ Phaff, UCD                                      |
| NCYC 2543 *                          | <i>Quercus kelloggii</i> (California, USA) | NCYC culture collection         | CBS                                                |
| NRRL YB-4290 *                       | <i>Quercus kelloggii</i> (California, USA) | NRRL culture collection         | HJ Phaff, UCD                                      |
| NRRL Y-7556 *                        | <i>Quercus kelloggii</i> (California, USA) | NRRL culture collection         | D. Yarrow, CBS                                     |
| UCD FST K-239 *                      | <i>Quercus kelloggii</i> (California, USA) | UCD culture collection          | HJ Phaff, UCD                                      |
| NRRL Y-11430                         | Most likely a subclone of the type strain  | NRRL culture collection         | Patent deposit<br>Phillips Petroleum Company (USA) |
| GS115                                | NTG-mutagenized derivative of NRRL Y-11430 | Internal VIB culture collection |                                                    |
| NCYC 2543 <i>his4</i>                | Mutagenesis                                | This publication                |                                                    |
| NCYC 2543 <i>hoc1<sup>tr-1</sup></i> | Mutagenesis                                | This publication                |                                                    |
| NCYC 2543 <i>hoc1<sup>tr-2</sup></i> | Mutagenesis                                | This publication                |                                                    |

1001  
1002  
1003  
1004

**Table 2. Overview of the functional mutations of the analysed *K. phaffii* strains compared to the CBS 7435 (eq. strain deposit of NRRL- Y-11430) reference genome, non-functional SNPs and indels are between brackets. Functional mutations are those resulting in a SNP or indel in a gene.**

| Strain Designation | SNP   | Indel  | Total  | Mutations/Mbp | Killer plasmids copy number (KP1/KP2) |
|--------------------|-------|--------|--------|---------------|---------------------------------------|
| NRRL Y-11430       | 0 (2) | 2 (18) | 2 (20) | 2.3           | 21/15                                 |
| NRRL YB-4290       | 2 (2) | 3 (20) | 5 (22) | 2.9           | 140/82                                |
| NCYC 2543          | 3 (5) | 3 (18) | 6 (23) | 3.1           | none detected                         |
| CBS 2612           | 3 (4) | 3 (19) | 6 (23) | 3.1           | none detected                         |
| NRRL Y-7556        | 3 (3) | 3 (21) | 6 (24) | 3.2           | 138/86                                |

1005

1006 **Table 3. Summary of the coding mutations in the Philips Petroleum strain and the type strains, compared to**  
 1007 **the CBS 7435 reference genome. The exact mutations are mentioned in the second column, with the CBS 7435**  
 1008 **amino acid as reference amino acid; although the original genetic makeup is as present in the type strains, and it is the**  
 1009 **CBS 7435/NRRL Y-11430 that mutated. The mutations indicated with an asterisk were also reported by Brady et. al.<sup>24</sup>.**  
 1010 **All mutations found in these strains are concentrated in eight locations. The mutations in SEF1, ROP100/RSF2, and**  
 1011 **HOC1 are shared by all type strains. Two mutations in a gene encoding for a hypothetical protein were found in all**  
 1012 **sequenced genomes. The other mutations (in SRB7, RAD18 and PRP46) are present in one of the type strains, NCYC**  
 1013 **2543, CBS 2612 and NRRL Y-7556, respectively.**

| Gene                                               | Mutation                                    | NRRL Y-11430 | NRRL YB-4290 | NCYC 2543 | CBS 2612 | NRRL Y-7556 | Gene function                                                 |
|----------------------------------------------------|---------------------------------------------|--------------|--------------|-----------|----------|-------------|---------------------------------------------------------------|
| <i>SEF1</i>                                        | SNP:<br>C315S                               |              | x            | x         | x        | x           | Putative transcription factor                                 |
| <i>ROP100/RSF2</i>                                 | SNP:<br>*748W                               |              | x*           | x         | x        | x*          | Methanol- and biotin-starvation-inducible zinc finger protein |
| <i>HOC1</i>                                        | Indel: (T) <sub>5→6</sub><br>Premature *    |              | x            | x         | x        | x           | Alpha 1,6mannosyltransferase                                  |
| Hypothetical                                       | Indel 1: +G<br>Indel 2: +GT<br>GNYD821GFPND | x            | x            | x         | x        | x           | Papain-like cysteine protease                                 |
| <i>SRB7</i>                                        | SNP:<br>E131Q                               |              |              | x         |          |             | RNA polymerase II mediator complex subunit                    |
| <i>RAD18</i>                                       | SNP:<br>K210N                               |              |              |           | x        |             | E3 ubiquitin ligase                                           |
| <i>PRP46</i>                                       | SNP:<br>Q320L                               |              |              |           |          | x           | NineTeen Complex (NTC) component                              |
| <b>Total mutations in protein-coding sequences</b> |                                             | <b>2</b>     | <b>5</b>     | <b>6</b>  | <b>6</b> | <b>6</b>    |                                                               |

1014

1015 **Table 4. Details of the selected proteins used for the protein expression comparisons.**

| Abbreviation  | Name                                                  | Type     | Molecular mass (kDa) | Secretion leader | Ref. |
|---------------|-------------------------------------------------------|----------|----------------------|------------------|------|
| GM-CSF        | Granulocyte-macrophage colony-stimulating factor      | Cytokine | 15.7                 | αMF              | 70   |
| GaOx          | Galactose oxidase from <i>Fusarium graminearum</i>    | Enzyme   | 69.9                 | αMF              | 73   |
| Cdiff-VHH-IgA | Anti- <i>C.difficile</i> toxin VHH IgA fusion protein | VHH-IgA  | 41.2                 | Ost1             | 72   |
| CovidVHH-IgG  | SARS-CoV-2 neutralizing VHH hIgG1 fusion protein      | VHH-IgG  | 40.6                 | Ost1             | 71   |
| GBP           | <i>GFP-binding protein</i>                            | VHH      | 14.1                 | MF               | 74   |

1016

1017 **Figures**

1018

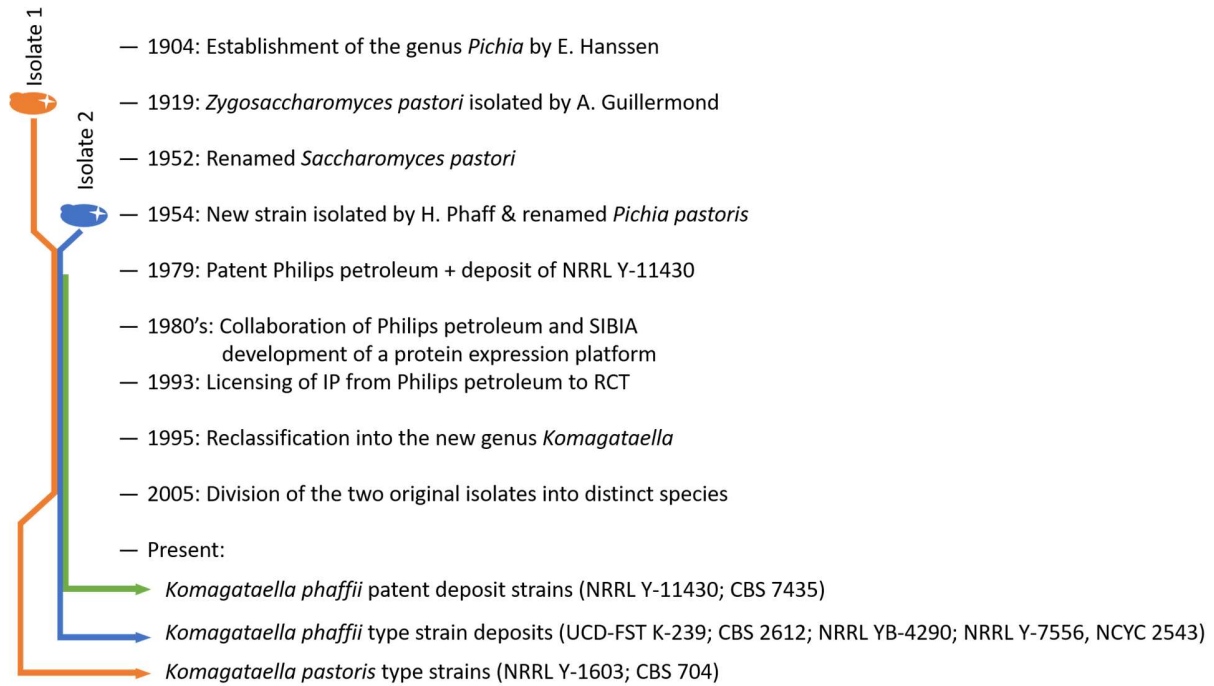

1019

1020

1021

**Figure 1. Schematic timeline of the history of the *Komagataella* species and the available type strain deposits and patent strain deposits.**

1022

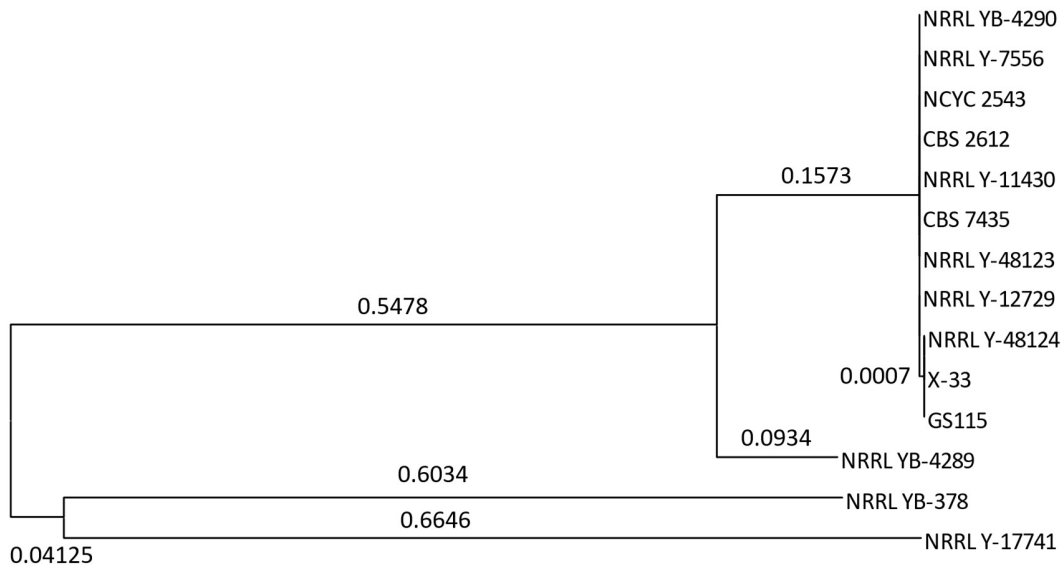

1023

1024

1025

**Figure 1: Phylogenetic tree of the *K. phaffii* strains with node lengths.** The tree was constructed using a Maximum Likelihood method and Hasegawa-Kishino-Yano model. Node lengths of less than 0.0001 were neglected.



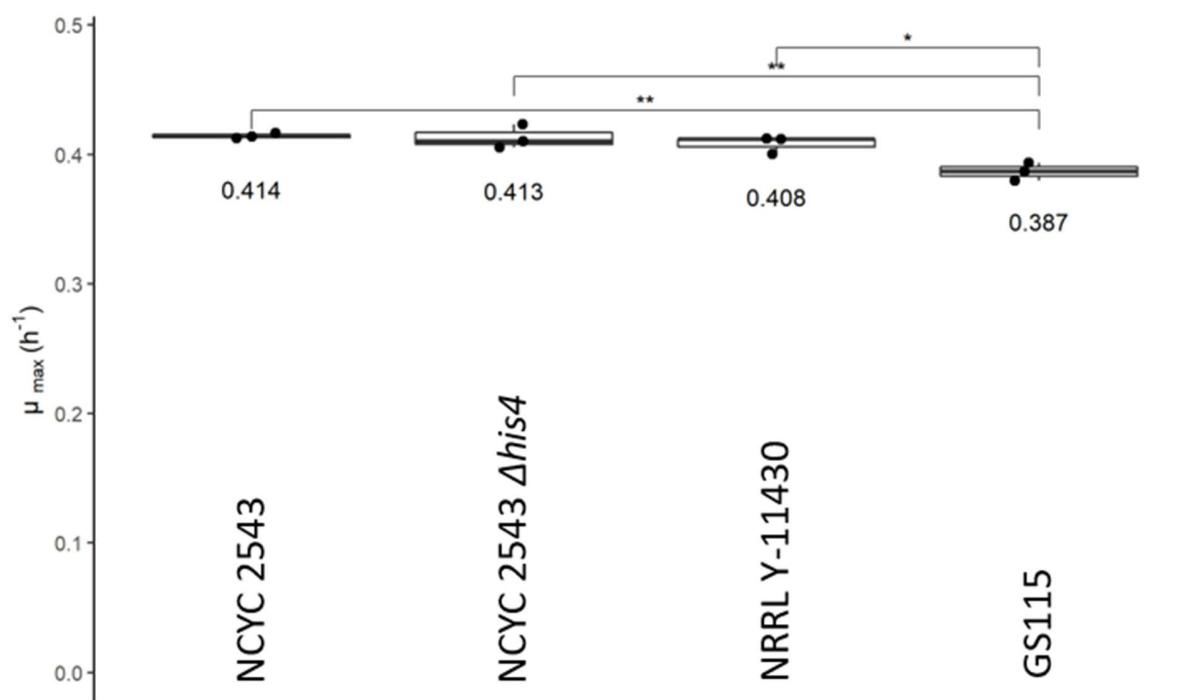

1026

1027 **Figure 3. Maximum growth rate of the different *Pichia* strains, plotted individually as dots, as well as a boxplot**  
1028 **with median value. A one-way ANOVA test showed significant influence of the strain on the growth rate**  
1029 **( $p = 0.0034$ ). A post-hoc Tukey test shows that GS115 grows significantly slower than the other strains. The asterisks**  
1030 **indicate the  $p$ -value of the Tukey test: \*\*,  $0.01 > p > 0.001$ ; \*,  $0.05 > p > 0.01$ .**

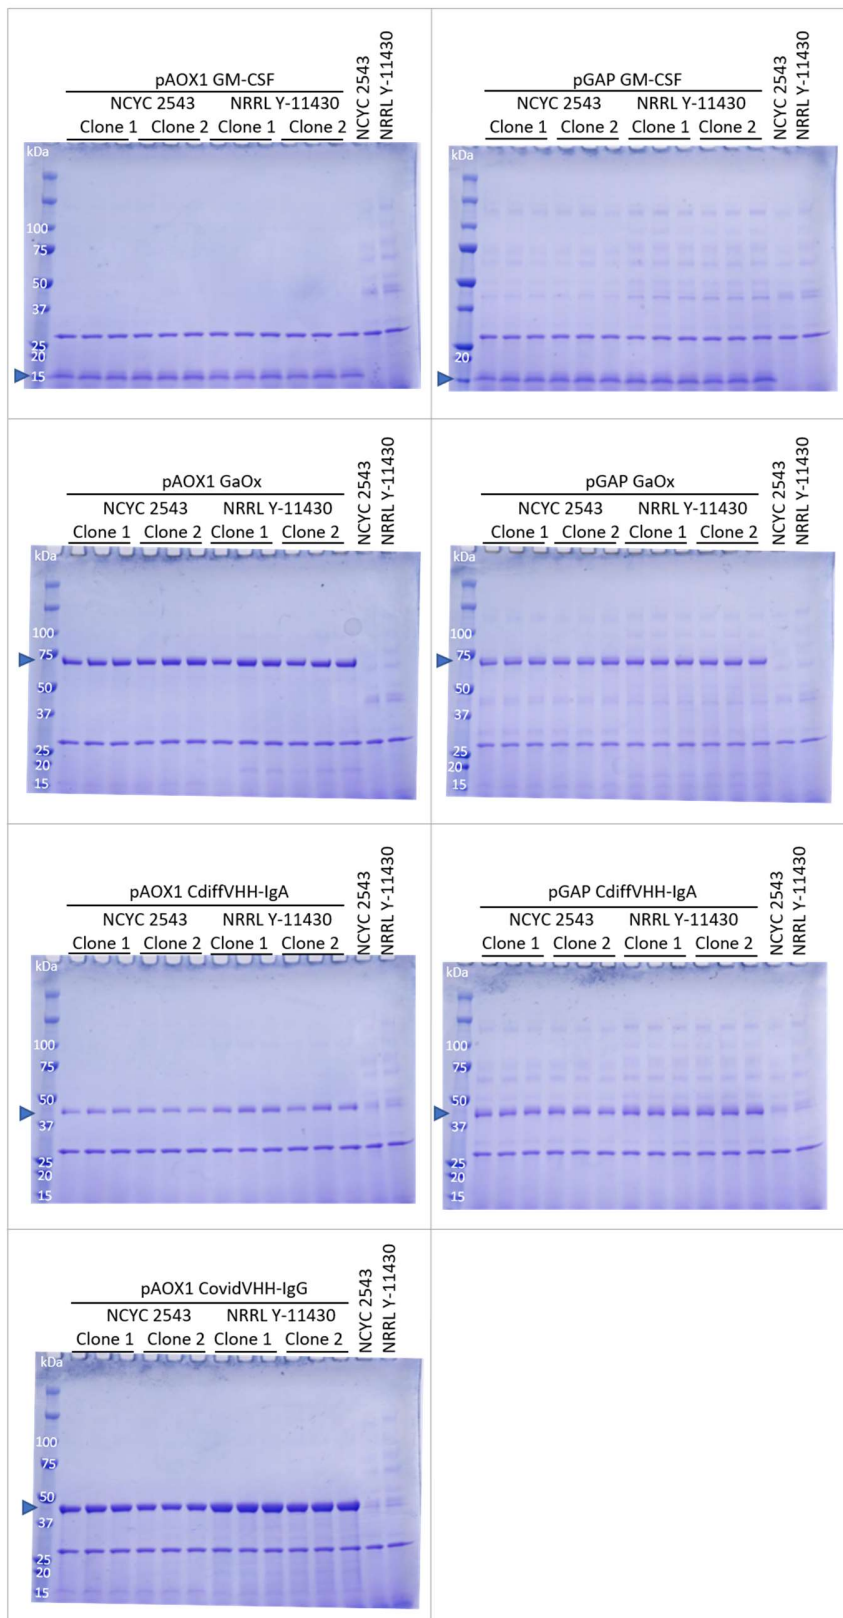

1031  
1032  
1033  
1034  
1035

**Figure 4. Expression comparison between NCYC 2543 and NRRL Y-11430.** The proteins were expressed using the GAP or AOX1 promoter. As controls, both wild type strains were grown and analysed as well. Supernatant samples were treated with EndoH to remove N-glycans and samples were analysed on SDS-PAGE. EndoH is also visible on the gels at around 30 kDa.

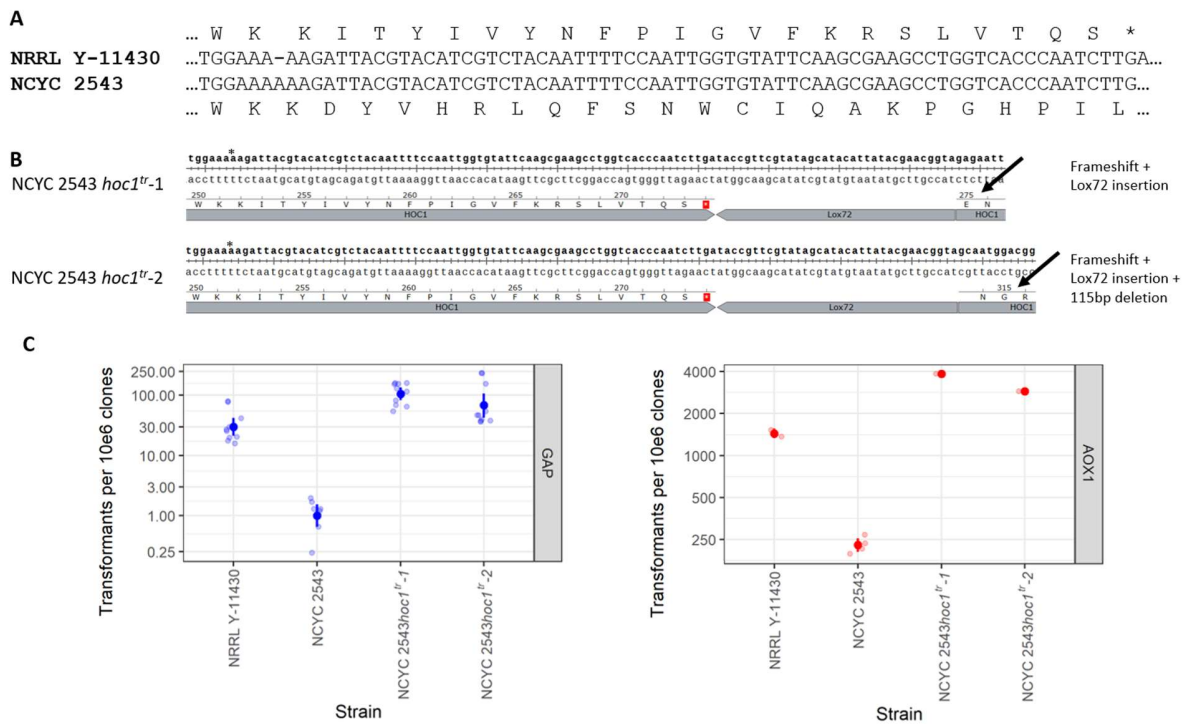

1036

1037

1038

1039

1040

1041

1042

1043

1044

**Figure 5. Overview of the HOC1 genome engineering strategy and the effect on transformation efficiency of the resulting strains.** A. Alignment of a part of the HOC1 gene as present in NRRL Y-11430 vs. NCYC 2543, showing the frameshift resulting in a premature stop codon in the NRRL Y-11430. B. Resulting genomic HOC1 sequence upon split-marker-based gene editing. Two strategies were followed, where either the single base pair deletion (indicated with \*) resulting in the Hoc1p truncation and a Lox72 scar is introduced downstream of the stop codon; or where an additional 115 bp deletion downstream of the resulting stop codon and Lox72 scar is introduced. C. Transformation efficiency in the two wild type strains and two HOC1-engineered strains, either using a pGAP-based plasmid (left) or a pAOX1-based plasmid (right). The analysis was performed as described in the Materials & Methods section.

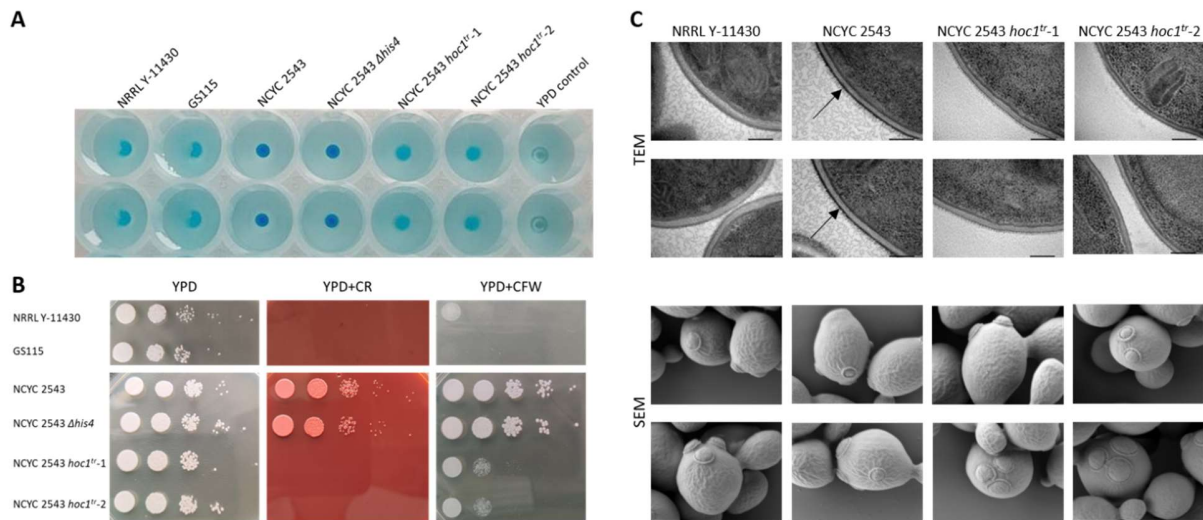

1045

1046

1047

1048

1049

1050

1051

1052

1053

1054

**Figure 6. Characterization of the cell walls of NRRL Y-11430, NCYC 2543 and the two NCYC 2543  $hoc1^{tr}$  mutants.**  
A. Alcian blue staining of the strains to determine the density of negative charges at the yeast cell wall. Alcian blue is a cationic dye that binds negative charges at the cell wall. The more intense the blue staining of the cells, the more negative charge, i.e., mannosylphosphate moieties, are present on the glycan trees of the cell wall mannoproteins. Duplicate wells are shown per strain (vertical). B. Sensitivity of the strains towards Congo red and Calcofluor white, compared to growth on YPD agar, as an indicator for cell wall integrity. The plates were incubated for 3 days at 30 °C. C. Transmission electron microscopy (TEM) and scanning electron microscopy (SEM) images of the four strains. The increased electron density of the outermost layer, i.e., the cell wall is indicated with an arrow in the TEM images of the NCYC 2543 strain. Only two individual images per strain are shown.

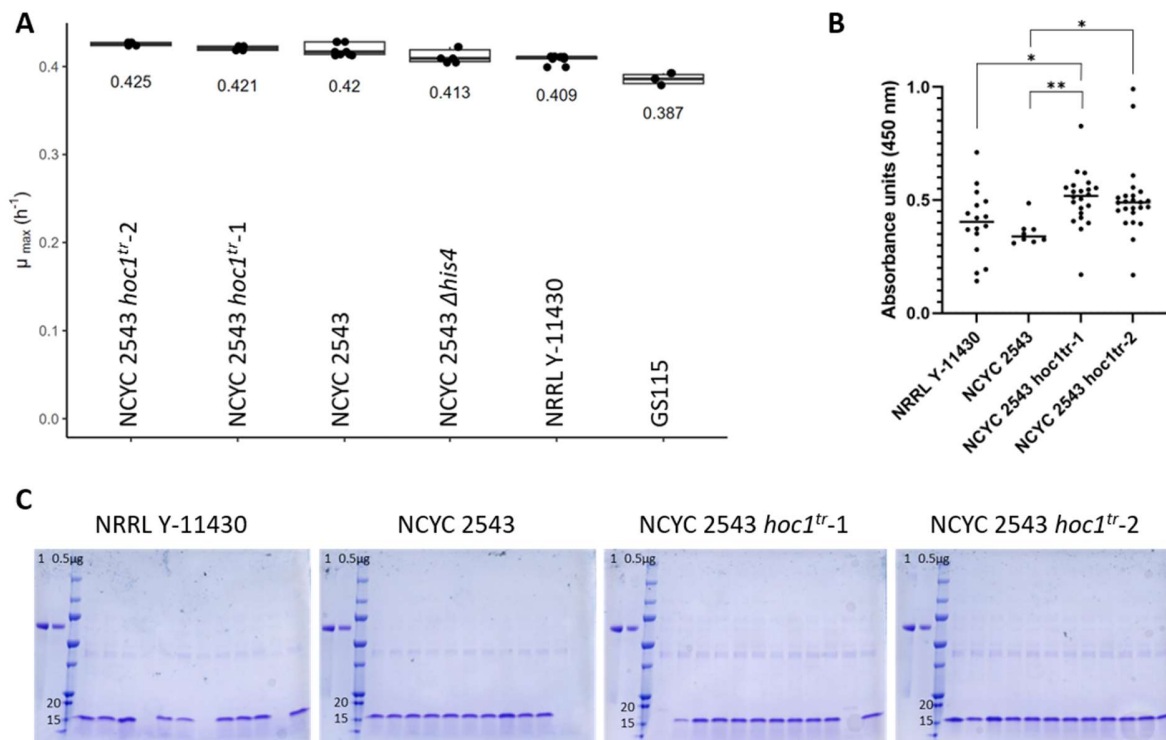

1055

1056

1057

1058

1059

1060

1061

1062

1063

1064

**Figure 7. Overview of the strain performance of NRRL Y-11430, NCYC 2543 and the two NCYC 2543/OPENPichia *hoc1<sup>tr</sup>* mutants.** A. Comparison of the maximal growth rate of the four main strains, accompanied by GS115 and the NCYC 2543/OPENPichia *his4*. B. ELISA results of 24 clones of pGAP-based GBP expression in the different strains (no selection for single copies was done, wells were excluded when no expression was observed on SDS-PAGE, assuming these clones contain no expression cassette, or due to a technical issue during the ELISA procedure). Absorbance units were background corrected. All strains were compared in a Kruskal-Wallis omnibus test, followed by pairwise comparison corrected with Dunn's multiple comparison procedure. Significance scores are annotated as follows, \*:  $0.002 < p < 0.03$ ; \*\*:  $0.001 < p < 0.002$ ; non-significant differences are not shown. C. SDS-PAGE analysis of the first 12 clones per transformation. Equal volumes of supernatant were loaded.



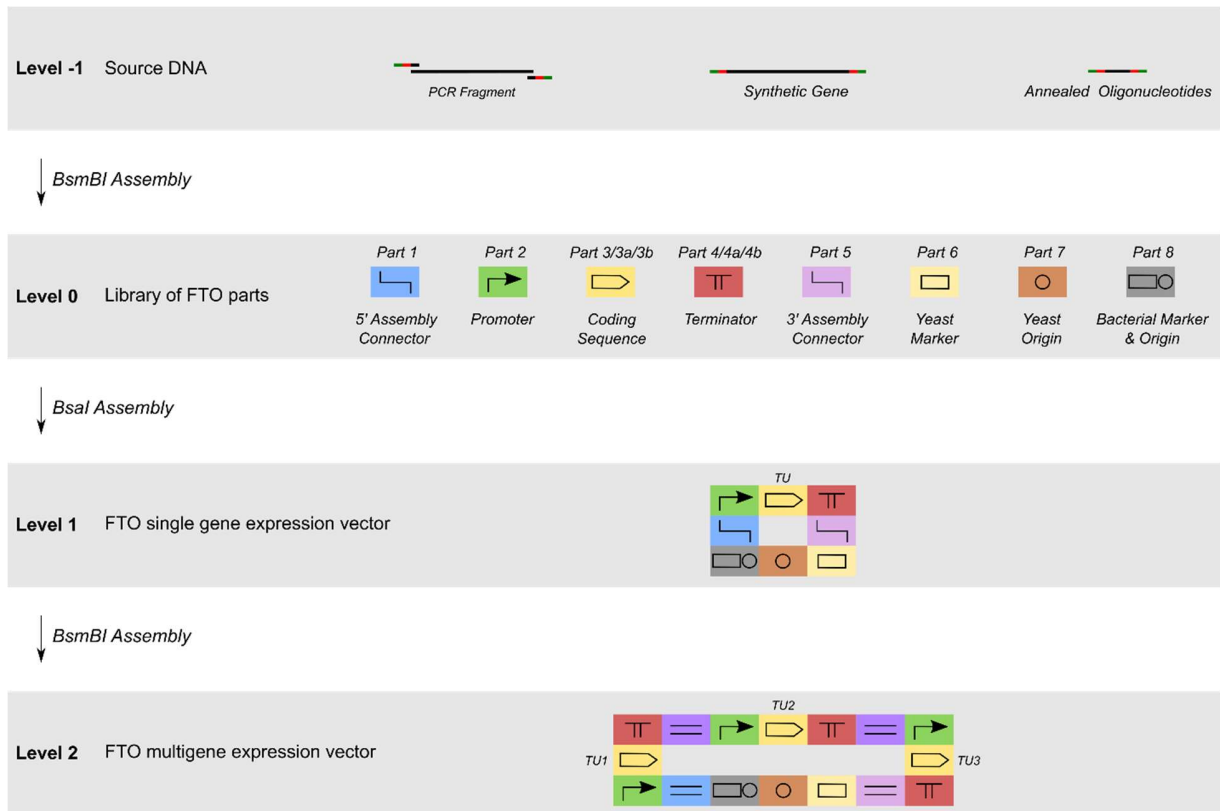

1065

1066

1067

1068

1069

1070

1071

1072

1073

1074

1075

**Figure 8. The modular cloning or MoClo principle.** In a first phase, source DNA, such as PCR fragments, synthetic genes or annealed oligonucleotides are flanked with the proper Type IIS restriction sites and 4 nt overhangs, which are then accommodated in a Level 0 entry vector through *BsmBI* digest and T4 DNA ligation. Then, selected Level 0 vectors are assembled into a Level 1 expression vector by means of a *BsaI* digest and T4 DNA ligation. Finally, the system allows the assembly of multiple transcription units (promoter, CDS, terminator) from the individual Level 1 vectors, into a higher order Level 2 vector, in case the assembly connector sequences were properly selected during the assembly of the Level 1 vectors. Assembled assembly connectors are depicted with two horizontal lines and different shades of blue and purple. Note that the Part 3 Coding Sequence can be split up in a Part 3a and Part 3b Coding Sequence, to allow additional modularity. Likewise, the Part 4 Terminator can be split up in a Part 4a Coding Sequence and a Part 4b Terminator. Figure adapted from Lee et al<sup>41</sup>.
